1                    PHLPP1 Counter-regulates STAT1-mediated Inflammatory Signaling

2                    **Ksenya Cohen-Katsenelson<sup>1,5</sup>, Joshua D. Stender<sup>2,5</sup>, Agnieszka T. Kawashima<sup>1,5</sup>, Gema**  
3                    **Lordén<sup>1</sup>, Satoshi Uchiyama<sup>3</sup>, Victor Nizet<sup>3,4</sup>, Christopher K. Glass<sup>2</sup>, and Alexandra C.**  
4                    **Newton\*<sup>1</sup>**

5                    <sup>1</sup>Department of Pharmacology

6                    <sup>2</sup>Department of Cellular and Molecular Medicine

7                    <sup>3</sup>Department of Pediatrics

8                    <sup>4</sup>Skaggs School of Pharmacy and Pharmaceutical Sciences,

9                    <sup>5</sup>Biomedical Sciences Graduate Program, University of California at San Diego, CA 92093

10                    <sup>5</sup>These authors contributed equally

11                    \*Correspondence to: Alexandra C. Newton

12                    Tel.: 858-534-4527; Fax: 858-822-5888

13                    [anewton@ucsd.edu](mailto:anewton@ucsd.edu)

14                    Running title: PHLPP1 Suppresses STAT1-mediated Inflammatory Signaling

## 15 **ABSTRACT**

16 Inflammation is an essential aspect of innate immunity but also contributes to diverse  
17 human diseases. Although much is known about the kinases that control inflammatory signaling,  
18 less is known about the opposing phosphatases. Here we report that deletion of the gene  
19 encoding PH domain Leucine-rich repeat Protein Phosphatase 1 (PHLPP1) protects mice from  
20 lethal lipopolysaccharide (LPS) challenge and live *Escherichia coli* infection. Investigation of  
21 PHLPP1 function in macrophages reveals that it controls the magnitude and duration of  
22 inflammatory signaling by dephosphorylating the transcription factor STAT1 on Ser727 to  
23 inhibit its activity, reduce its promoter residency, and reduce the expression of target genes  
24 involved in innate immunity and cytokine signaling. This previously undescribed function of  
25 PHLPP1 depends on a bipartite nuclear localization signal in its unique N-terminal extension.  
26 Our data support a model in which nuclear PHLPP1 dephosphorylates STAT1 to control the  
27 magnitude and duration of inflammatory signaling in macrophages.

## 28 **HIGHLIGHTS**

- 29 • PHLPP1 controls the transcription of genes involved in inflammatory signaling
- 30 • PHLPP1 dephosphorylates STAT1 on Ser727 to reduce its transcriptional activity
- 31 • PHLPP1 has a nuclear localization signal and a nuclear exclusion signal
- 32 • Loss of PHLPP1 protects mice from sepsis-induced death

## 33 INTRODUCTION

34 Gene expression is an exquisitely regulated process that maintains cellular homeostasis  
35 and orchestrates appropriate responses to environmental stimuli such as hormones, cytokines,  
36 and pathogenic microbes (Dawson and Kouzarides, 2012; Flavahan et al., 2017). Homeostatic  
37 control of inflammatory genes is particularly relevant to cancer since chronic inflammation  
38 promotes tumorigenesis and influences patient response to cancer therapeutics (Coussens and  
39 Werb, 2002; Grivennikov et al., 2010). Dysregulated gene expression, a hallmark of cancer, can  
40 arise from mutations in transcription factors (exemplified by p53 (Sabapathy and Lane, 2018)),  
41 alterations in signaling pathways controlling transcription factor function (for example,  
42 hormone-dependent transcription factors in prostate and breast cancers (Jernberg et al., 2017;  
43 Pejerrey et al., 2018)), or upregulation of oncogenic transcription factors (notably c-myc, which  
44 regulates essential cell-cycle checkpoints (Kalkat et al., 2017)). Aberrant protein phosphorylation  
45 underpins all of these mechanisms, via dysregulation of signaling pathways, alterations in  
46 transcription factor machinery, and/or effects on the chromatin epigenetic landscape (Rossetto et  
47 al., 2012; Whitmarsh and Davis, 2000). Thus, targeting phosphorylation mechanisms is of  
48 considerable therapeutic interest.

49 Macrophages are among the first responders to infection, engaging foreign pathogens via  
50 pattern recognition receptors, including the Toll-like receptors (TLRs). TLRs are a conserved  
51 family of cell surface or phagosome-associated receptors that discriminate distinct features of  
52 microbial and viral pathogens, including lipoproteins (TLR1/2/6), lipopolysaccharide (LPS)  
53 (TLR4), flagellin (TLR5), single-stranded RNA (TLR7/8), double-stranded RNA (TLR3), and  
54 double-stranded DNA (TLR9) (Karin et al., 2006; O'Neill et al., 2013). Upon pathogen  
55 recognition by TLRs, a pro-inflammatory response is initiated that activates the signal-dependent

56 transcription factors nuclear factor- $\kappa$  B (NF $\kappa$ B), activator protein 1 (AP1), interferon response  
57 factors (IRFs), and, through secondary mechanisms, the signal transducer and activator of  
58 transcription (STAT) protein family (O'Neill et al., 2013). These activated transcription factors  
59 function in a combinatorial manner to drive expression of antimicrobial and inflammatory  
60 response genes that aid in elimination of foreign pathogens. However, while inflammation is  
61 required for protection against foreign microbes, it can lead to excessive cytokine production,  
62 chronic inflammation, and cancer if not properly resolved (Coussens and Werb, 2002; Fullerton  
63 and Gilroy, 2016; Grivennikov et al., 2010). Thus, macrophages have evolved regulatory  
64 mechanisms to resolve inflammatory responses in a timely manner, including shut down of  
65 STAT1 signaling pathways by the suppressor of cytokine signaling (SOCS) family of proteins  
66 (O'Shea and Murray, 2008), suppression of nitric oxide production by the enzyme arginase  
67 (Wynn and Vannella, 2016), and inhibition of a key subset of NF $\kappa$ B-dependent genes by anti-  
68 inflammatory omega-3 fatty acids, (Oishi et al., 2017).

69         STAT1 is the founding member of the STAT transcription factor family and serves as a  
70 paradigm for how phosphorylation regulates transcription factor structure, function, and  
71 localization (Darnell et al., 1994; Stark and Darnell, 2012). In the canonical pathway, STATs are  
72 recruited from the cytosol to cytokine-bound and Tyr-phosphorylated receptors where they are  
73 phosphorylated on a key Tyr residue (Tyr701 for STAT1) by Janus Kinases (JAKs). This  
74 phosphorylation event promotes STAT dimerization and nuclear entry, allowing STAT binding  
75 to specific promoter sequences and thus initiating gene transcription. Upon promoter binding,  
76 STATs become additionally phosphorylated on a regulatory Ser residue at a MAPK consensus  
77 sequence (Ser727 for STAT1), a modification that enhances their transcriptional activity  
78 (Darnell, 1997; Sadzak et al., 2008; Wen et al., 1995b; Whitmarsh and Davis, 2000).

79 Importantly, STAT1 transduces signals from type I and II interferons (IFNs), resulting in binding  
80 to IFN-stimulated response elements (ISREs) and to IFN-gamma (IFN $\gamma$ )-activated site (GAS)  
81 elements in the promoters of IFN-stimulated genes (ISGs), inducing their transcription and  
82 stimulating inflammation (Platanias, 2005). While the kinases that phosphorylate Tyr701 and  
83 Ser727 on STAT1 have been extensively studied, as have been the phosphatases that  
84 dephosphorylate Tyr701, the phosphatases that oppose the Ser727 phosphorylation are unknown.

85 PH domain Leucine-rich Repeat Protein Phosphatase 1 (PHLPP1) is one of the newest  
86 members of the phosphatome (Chen et al., 2017; Gao et al., 2005). Originally discovered for its  
87 function in suppressing growth factor signaling by dephosphorylating Akt on the hydrophobic  
88 motif site, Ser473 (Gao et al., 2005), the repertoire of PHLPP1 substrates is continually  
89 expanding (Grzechnik and Newton, 2016). PHLPP1 is a bona fide tumor suppressor: its  
90 expression is frequently lost in cancer and its genetic ablation in a mouse model results in  
91 prostate neoplasia (Chen et al., 2011; Liu et al., 2009). PHLPP1 is also involved in the immune  
92 response, where its dephosphorylation of Akt reduces the capacity of regulatory T cells to  
93 transduce T cell receptor signals, a key function in T cell development (Patterson et al., 2011).  
94 Recently, PHLPP1 was shown to suppress receptor tyrosine kinase gene expression and  
95 influence growth factor signaling, including that mediated by the epidermal growth factor (EGF)  
96 receptor (Reyes et al., 2014).

97 PHLPP1 is unusual among protein phosphatases in that its regulatory modules and  
98 catalytic domain are on the same polypeptide. Most notably, it has a PH domain essential for  
99 dephosphorylation of protein kinase C (PKC) (Gao et al., 2008), a PDZ ligand necessary for Akt  
100 recognition (Gao et al., 2005), and a leucine-rich repeat (LRR) segment required for  
101 transcriptional regulation of receptor tyrosine kinases (Reyes et al., 2014). In addition, PHLPP1

102 possesses an approximately 50 kDa N-terminal extension (NTE) of unknown function.  
103 Stoichiometric association with substrates by direct binding to the protein-interaction domains on  
104 PHLPP or common scaffolds (e.g. PDZ domain proteins such as Scribble (Li et al., 2011))  
105 allows fidelity and specificity in PHLPP function, and may account for its >10-fold lower  
106 catalytic rate compared to the closely related phosphatase PP2C $\alpha$  (Sierecki and Newton, 2014).  
107 Given its transcriptional regulation of at least one family of genes, PHLPP1 is an attractive  
108 pharmacological target for modulation of gene expression.

109         Here we report that nuclear-localized PHLPP1 opposes STAT1 Ser727 phosphorylation  
110 to inhibit its transcriptional activity and promote normal resolution of inflammatory signaling.  
111 We find that *Phlpp1*<sup>-/-</sup> mice have improved survival following infection with *Escherichia coli* (*E.*  
112 *coli*), indicating a role of the phosphatase in innate immunity. Since macrophages are key in the  
113 initial response to lipopolysaccharide (LPS) from Gram-negative bacteria such as *E. coli*, we  
114 further explored the role of PHLPP1 in controlling LPS-dependent signaling in this cell type.  
115 The STAT1 binding motif was identified from the most common promoter sequences of 199  
116 genes that remained elevated following LPS treatment of bone marrow-derived macrophages  
117 (BMDMs) from *Phlpp1*<sup>-/-</sup> mice compared to those from wild-type (WT) mice. We validated  
118 common transcriptional targets of PHLPP1 and STAT1, showing that loss of PHLPP1  
119 upregulated the transcription of several genes including guanylate binding protein 5 (*Gbp5*),  
120 whereas loss of STAT1 downregulated them. Dephosphorylation of STAT1 on Ser727  
121 suppressed its transcriptional activity, and the cellular effects of PHLPP1 depend both on its  
122 catalytic activity and a previously undescribed nuclear localization signal (NLS). Taken together,  
123 our results identify PHLPP1 as a major player in the resolution of inflammatory signaling.

## 124 RESULTS

### 125 PHLPP1 regulates the innate immune response

126 To explore the role of PHLPP1 in acute inflammation, we examined the kinetics and  
127 outcome of sepsis-induced death caused by intraperitoneal (i.p.) injection of Gram-negative *E.*  
128 *coli* bacteria in WT and *Phlpp1*<sup>-/-</sup> mice. Surprisingly, absence of PHLPP1 provided a strong  
129 protective effect; at a dose where more than 50% of WT mice died within 12 h of *E. coli*  
130 challenge, 50% of the *Phlpp1*<sup>-/-</sup> mice remained alive after 10 days (**Figure 1A**). Similarly,  
131 *Phlpp1*<sup>-/-</sup> mice were protected from toxicity induced by the purified Gram-negative bacterial cell  
132 wall component LPS, with nearly half of the *Phlpp1*<sup>-/-</sup> mice alive after 10 days compared to only  
133 1 out of 16 of the WT mice (**Figure 1B**). To understand the lower mortality rates in *Phlpp1*<sup>-/-</sup>  
134 mice, we measured levels of different cytokines in the serum of mice across a time course  
135 following LPS injection (**Figure 1C-E**). Serum levels of pro-inflammatory cytokine interleukin 6  
136 (IL-6) were significantly increased in WT mice within 5 h of LPS injection, returning to baseline  
137 within 12 h (**Figure 1C**). In contrast, the *Phlpp1*<sup>-/-</sup> mice had 2-fold lower IL-6 levels at 5 h post-  
138 infection, but these levels were sustained for up to 24 h, suggestive of improper resolution of  
139 inflammation. Levels of another pro-inflammatory cytokine, IL-1 $\beta$ , were likewise consistently  
140 higher in *Phlpp1*<sup>-/-</sup> mice compared with WT mice (**Figure 1D**). By contrast, levels of anti-  
141 inflammatory cytokine IL-10 did not differ significantly between the WT and *Phlpp1*<sup>-/-</sup> mice  
142 (**Figure 1E**). These findings indicate an essential role for PHLPP1 in regulation of the innate  
143 immune response at the whole organism level.

## 144 **Loss of PHLPP1 results in a increased STAT1-dependent transcription in macrophages**

145           Since macrophages are a key cell type involved in the initial response to *E. coli* infection  
146 and LPS challenge, we analyzed the transcriptome of BMDMs isolated from WT or *Phlpp1*<sup>-/-</sup>  
147 mice before and after stimulation by the major LPS component, Kdo2-Lipid A (KLA), for 1, 6,  
148 or 24 h (**Figure 2A**). RNA-Seq analysis identified 1,654 mRNA transcripts induced more than  
149 two-fold by KLA treatment, with a false discovery rate (FDR) less than 0.05 at any of the time  
150 points. Expression of approximately 12% of these genes (199 genes; **Table S1**) was increased in  
151 macrophages from *Phlpp1*<sup>-/-</sup> mice compared to those from littermate control WT mice 6 h  
152 following KLA treatment; transcript levels of these genes remained significantly elevated (>two-  
153 fold) 24 h later. Another set of genes exhibited reduced expression 24 h following KLA  
154 treatment (144 genes; **Table S2**). Gene ontology analysis revealed that many of the genes whose  
155 expression was elevated in the *Phlpp1*<sup>-/-</sup> macrophages are associated with inflammatory  
156 signaling: these included genes annotated for their involvement in the innate immune response,  
157 cytokine-cytokine receptor interactions, LPS signaling, interferon- $\beta$  response, and tumor  
158 necrosis factor (TNF) signaling-dependent pathways (**Figure 2B**). Genes significantly decreased  
159 in *Phlpp1*<sup>-/-</sup> compared to WT macrophages were enriched most significantly in nodes related to  
160 central carbon metabolism, and to a lesser extent, chronic inflammatory responses and LPS  
161 signaling (**Figure 2B**).

162           To gain insight into gene regulatory mechanisms affected by loss of PHLPP1, we  
163 performed *de novo* motif analysis of the promoters of upregulated genes in *Phlpp1*<sup>-/-</sup>  
164 macrophages using Hypergeometric Optimization of Motif EnRichment (HOMER), a suite of  
165 tools for motif discovery and Next Generation Sequencing (NGS) analysis (Heinz et al., 2010).  
166 This algorithm defines motifs that are statistically enriched in a targeted promoter list compared



167 to random promoter sequences with comparable GC content. The analysis revealed significant  
168 enrichment of STAT ( $p < 10^{-18}$ ) and IRF ( $p < 10^{-9}$ ) motifs (**Figure 2C**) in the promoters of genes  
169 whose expression was statistically increased in *Phlpp1*<sup>-/-</sup> macrophages compared to WT  
170 macrophages. Of the 199 genes with elevated expression, 46% of the genes had promoters with a  
171 consensus STAT binding motif, 51% had promoters with a potential binding site for IRF family  
172 of transcription factors, and 26% had promoters with predicted binding sites for both STAT and  
173 IRF (**Figure 2D**). We selected for further analysis three genes whose expression was elevated in  
174 the *Phlpp1*<sup>-/-</sup> compared to WT macrophages and which had proximal STAT1 binding motifs in  
175 their promoters: *Cd69*, *Ifit2*, and *Gbp5*. Normalized mRNA-Seq data for each of these three  
176 genes confirmed elevated mRNA levels in *Phlpp1*<sup>-/-</sup> macrophages compared to WT macrophages  
177 (**Figure 2E-G**). Thus, loss of PHLPP1 leads to sustained KLA-induced expression of genes  
178 involved in inflammation, of which 46% have predicted STAT motifs in their proximal  
179 regulatory regions.

180 If PHLPP1 suppresses STAT-regulated gene transcription, we reasoned that 1]  
181 knockdown of a STAT family member should reduce transcription of the same genes affected by  
182 loss of PHLPP1 and 2] knockdown of PHLPP1 should enhance STAT binding to its promoters.  
183 STAT1 is required for LPS-induced gene expression in macrophages (Ohmori and Hamilton,  
184 2001) and implicated as a PHLPP1 target in iNOS regulation (Alamuru et al., 2014). STAT1  
185 knockdown by siRNA in thioglycollate-elicited peritoneal macrophages resulted in a 2-fold  
186 reduction in KLA-induced transcription of *Cd69*, *Ifit2*, and *Gbp5* at 6 h compared to a control  
187 siRNA transfection, with transcript levels dropping to near baseline by 24 h (**Figure 3A-C**). The  
188 effect of PHLPP1 knockdown on STAT1 promoter occupancy was examined by chromatin  
189 immunoprecipitation (ChIP) using STAT1-specific antibodies. KLA induced STAT1 binding to

190 the promoters of *Cd69*, *Ifit2*, and *Gbp5*, with maximal binding observed 1 h post stimulation,  
191 followed by a decay in binding to near baseline after 24 h (**Figure 3D-F**). In contrast, binding to  
192 these promoters was enhanced and sustained in *Phlpp1*<sup>-/-</sup> macrophages relative to WT cells. The  
193 degree of enhancement and the kinetics of activation/resolution varied depending on the gene  
194 examined: PHLPP1 loss had the most robust early effect (1 h) on the *Ifit2* promoter and at a later  
195 time (24 h) on the *Cd69* promoter. Thus, PHLPP1 suppresses KLA-stimulated binding of STAT1  
196 to its promoters and thereby reduces transcription of its target genes.

197

### 198 **PHLPP1 binds to STAT1 and dephosphorylates Ser727**

199 We next examined whether PHLPP1 affects the phosphorylation state of the two  
200 regulatory STAT1 phosphorylation sites, Ser727 and Tyr701. Primary BMDMs were isolated  
201 from WT and *Phlpp1*<sup>-/-</sup> mice and the kinetics and magnitude of KLA-triggered phosphorylation at  
202 each of the two STAT1 sites were compared. Loss of PHLPP1 in BMDMs led to a robust  
203 increase in STAT1 phosphorylation on the regulatory site Ser727 but did not affect Tyr701  
204 phosphorylation (**Figure 4A-B**). PHLPP1 loss also resulted in an increase in Erk  
205 phosphorylation at its activation loop sites, as previously reported (Reyes et al., 2014).  
206 Incubation of *in vitro* phosphorylated STAT1 with immunoprecipitated FLAG-tagged PHLPP1  
207 resulted in dephosphorylation at Ser727, suggesting that PHLPP1 directly dephosphorylates  
208 STAT1 (**Figure 4C**). Furthermore, overexpression of PHLPP1 in HEK-293T cells reduced  
209 IFN $\gamma$ -dependent phosphorylation of STAT1 on Ser727 but not on Tyr701 (**Figure 4D-E**). Thus,  
210 PHLPP1 selectively dephosphorylates the Ser727 regulatory phosphorylation on STAT1 in cells  
211 and *in vitro*.

212 Because the abundance of PHLPP1 in the cell is much lower than other phosphatases  
213 such as PP2A (Hein et al., 2015), we next sought to determine whether regulation of STAT1  
214 promoter activity was solely due to PHLPP1 phosphatase activity or occurred in combination  
215 with other phosphatases. Taking advantage of the insensitivity of PHLPP phosphatases to the  
216 PP1/PP2A inhibitor okadaic acid (OA) (Gao et al., 2005), we examined whether OA treatment  
217 affected KLA-dependent changes on Ser727 phosphorylation in primary BMDMs from WT  
218 mice. **Figure 5A-B** shows that the KLA-induced increase in Ser727 phosphorylation was  
219 relatively insensitive to OA, under conditions where the phosphorylation of Erk (at  
220 Thr202/Tyr204) and Akt (at Thr308) was significantly increased upon OA addition. These data  
221 are consistent with PHLPP1, a PP2C family member, being the primary regulator of  
222 phosphorylation on the activity-tuning Ser727 site of STAT1.

223 We next addressed whether enhanced promoter binding of STAT1 upon loss of PHLPP1  
224 resulted in enhanced transcriptional activation using a luciferase reporter assay. WT or *Phlpp1*<sup>-/-</sup>  
225 mouse embryonic fibroblasts (MEFs) were co-transfected with a firefly luciferase reporter  
226 construct containing GAS promoter elements, as well as a renilla luciferase controlled by a  
227 constitutive CMV promoter as an internal control. STAT1 promoter activity was assessed by  
228 monitoring luminescence following IFN $\gamma$  stimulation. **Figure 6A** shows that STAT1 promoter  
229 activity was significantly higher in *Phlpp1*<sup>-/-</sup> MEFs compared to WT MEFs at both 6 h and 24 h.  
230 Pre-treatment of cells with okadaic acid, under conditions that increased the phosphorylation of  
231 PP2A-sensitive substrates (see **Figure 5A**), had no effect on STAT1 promoter activity (**Figure**  
232 **6A**). Because STAT1 functions in the nucleus, we next asked whether PHLPP1 regulation of  
233 STAT1 occurs in the cytoplasm or nucleus. To this end, we assessed the effect of expressing  
234 either the PP2C domain of PHLPP1 or a nuclear-targeted (NLS) PP2C domain of PHLPP1 on

235 IFN $\gamma$ -induced STAT1 promoter activity via the GAS luciferase assay (**Figure 6B**). The  
236 overexpressed PP2C domain of PHLPP1 (**Figure 6C, blue**) was considerably less effective in  
237 inhibiting STAT1 promoter activity compared to full-length PHLPP1 (**Figure 6B, red**).  
238 However, forcing the PP2C domain into the nucleus by attaching an NLS to its N-terminus  
239 inhibited STAT1 promoter activity as effectively as overexpression of full-length PHLPP1  
240 (**Figure 6B, orange**). Analysis of the subcellular localization of the constructs used in this  
241 experiment revealed that full-length PHLPP1 was primarily cytosolic, the isolated PP2C domain  
242 had increased nuclear localization, and the NLS-PP2C was enriched in the nucleus (**Figure S2**).  
243 To address whether PHLPP1 catalytic activity is required for STAT1 regulation, we utilized a  
244 phosphatase-dead PP2C domain in which two active site residues, Asp1210 and Asp1413  
245 (Sierecki and Newton, 2014) were mutated to Ala (DDAA). The catalytically-inactive NLS-  
246 PP2C was no longer able to suppress STAT1 activity (**Figure 6C, purple**);  
247 immunohistochemistry confirmed its nuclear localization (**Figure S1**). Thus, both the catalytic  
248 activity and nuclear localization of PHLPP1 are necessary for it to regulate STAT1  
249 transcriptional activity.

250

### 251 **PHLPP1 has a bipartite Nuclear Localization Signal in its N-Terminal Extension**

252 Bioinformatics analysis of the sequence of PHLPP1 using SeqNLS (Lin and Hu, 2013)  
253 revealed a potential Arg-rich bipartite NLS (<sup>92</sup>RRRRR-X-<sup>122</sup>RRGRLKR) in the N-terminal  
254 extension unique to the PHLPP1 isozyme (**Figure 6D**). To test whether these basic segments  
255 function as an NLS, we examined the subcellular localization in HeLa cells of the NTE alone or  
256 NTE in which the basic residues in each or both halves of the potential bipartite NLS were  
257 mutated to Ala (**Figure 6E**). Immunocytochemistry revealed that the NTE localizes to the

258 nucleus. Mutation of the first NLS or the second NLS increased the distribution of the NTE to  
259 the cytosol, and mutation of both decreased the nuclear:cytoplasmic ratio to be comparable to  
260 that of a construct of the NTE with a strong Nuclear Exclusion Signal (NES) (LALKLAGLDI  
261 from PKI (Wen et al., 1995a) (**Figure 6F**). Full-length PHLPP1 was primarily cytosolic, leading  
262 us to ask whether there may also be an NES. Bioinformatics analysis of the primary sequence  
263 identified a potential Leu-rich NES (Fu et al., 2011) immediately following the last LRR and  
264 preceding the phosphatase domain (**Figure S3**). Attachment of this 14-residue sequence to the N-  
265 terminus of the NTE resulted in distribution of the NTE to the cytosol (**Figure S3**). Thus,  
266 PHLPP1 nuclear localization is controlled by a bipartite NLS in the NTE and is opposed by an  
267 NES following the LRR. Lastly, we examined the effect of mutating the NLS on the ability of  
268 full-length PHLPP1 to reduce STAT1 transcriptional activity as assessed using the GAS  
269 promoter assay. The reduction in IFN $\gamma$ -induced STAT1 activity resulting from PHLPP1  
270 overexpression (**Figure 6G**, red) was abolished upon mutation of NLS2 (**Figure 6G**, brown) or  
271 both halves of the NLS (NLS1/2) (**Figure 6G**, purple). Mutation of NLS1 had an intermediate  
272 effect (**Figure 6G**, blue). These data reveal that a bipartite NLS in the NTE of PHLPP1 localizes  
273 PHLPP1 to the nucleus, where it suppresses the transcriptional activity of STAT1.

274 We next assessed which domain of PHLPP1 contributes to the observed regulation of  
275 STAT1 activity on the GAS promoter. Overexpression of full-length PHLPP1 in HEK-293T  
276 cells markedly reduced GAS promoter activity (**Figure 7A**, red) compared to the vector only  
277 control (**Figure 7A**, black). A construct of PHLPP1 lacking the NTE (deletion of first 512 amino  
278 acids of its N-terminus; P1 $\Delta$ NTE, blue) was less effective than full-length PHLPP1 in reducing  
279 STAT1 activity, whereas a construct comprised of just the NTE (amino acids 1-512, green)  
280 caused a significant increase in GAS promoter activity, suggesting a dominant-negative function

281 of this segment. Co-immunoprecipitation assays revealed a robust interaction of STAT1 with the  
282 immunoprecipitated NTE of PHLPP1, in contrast to barely detectable binding of STAT1 to  
283 PHLPP1 lacking the NTE (**Figure 7B**). Intermediate binding was observed between STAT1 and  
284 full-length PHLPP1. Quantification of three independent experiments revealed that the isolated  
285 NTE of PHLPP1 binds STAT1 approximately five times more strongly than full-length PHLPP1  
286 and 26 times more strongly than PHLPP1 lacking the NTE (**Figure 7C**). These data reveal that  
287 the NTE of PHLPP1 interacts with STAT1 and reduces its promoter activity.

288

289

290 **DISCUSSION**

291 The finding that *Phlpp1*<sup>-/-</sup> mice are protected from LPS-induced death allowed us to identify  
292 PHLPP1 as a physiologically relevant phosphatase in the overall innate immune response. It is  
293 likely that this immunoregulatory phenotype reflects roles of PHLPP1 in several immune cell  
294 types, and future studies of mice with cell-specific deletions of *Phlpp1* will be of great interest.  
295 Investigation of *Phlpp1*<sup>-/-</sup> macrophages indicates a significant role in counter-regulation of  
296 STAT1-dependent transcription that emerges as a secondary response to TLR4 ligation. Our  
297 mechanistic analyses show that PHLPP1 dephosphorylates STAT1 on a key regulatory site to  
298 suppress its transcriptional activity towards an array of genes involved in mounting an  
299 inflammatory response to IFN $\gamma$ . Specifically, PHLPP1 directly dephosphorylates Ser727 on  
300 STAT1 *in vitro* and specifically suppresses phosphorylation of Ser727, but not Tyr701, on  
301 STAT1 in cells, correlating to decreased transcriptional activity of STAT1 at one of its major  
302 binding sites, the GAS promoter. The intrinsic catalytic activity and nuclear localization of  
303 PHLPP1 is required for this transcriptional regulation; while the isolated PP2C domain is not  
304 efficient in suppressing GAS promoter activity, forcing the PP2C domain into the nucleus is as  
305 effective as the full-length phosphatase in controlling transcriptional activity. Nuclear  
306 localization of the full-length enzyme is driven by a bipartite NLS we identify in the NTE.  
307 Elimination of PHLPP1 results in global changes in LPS-dependent transcriptional regulation,  
308 with 20% of the approximately 2,000 genes whose expression changes upon LPS stimulation  
309 differing by more than two-fold in BMDMs from *Phlpp1*<sup>-/-</sup> mice compared to WT mice.

310 Phosphorylation of STAT1 on Ser727 has been proposed to occur following the binding of  
311 the Tyr-phosphorylated STAT1 dimer to chromatin (Sadzak et al., 2008). Ser727  
312 phosphorylation on the C-terminal transactivation domain of STAT1 is necessary for maximal

313 transcriptional activity. Identification of PHLPP1 as a phosphatase that opposes this  
314 phosphorylation provides a mechanism to counter-regulate the activity of this key transcription  
315 factor. Several lines of evidence suggest that PHLPP1 may be the major phosphatase that  
316 controls this regulatory site. First, genetic depletion of PHLPP1 increases both STAT1 Ser727  
317 phosphorylation and transcriptional activity at the GAS promoter, whereas PHLPP1  
318 overexpression decreases both STAT1 Ser727 phosphorylation and transcriptional activity at the  
319 promoter. Second, both the IFN $\gamma$ -induced phosphorylation of Ser727 and resulting increase in  
320 transcriptional activity at the GAS promoter are insensitive to OA, a phosphatase inhibitor that is  
321 ineffective towards PP2C family members but highly effective towards the abundant PP2A in  
322 cells. The insensitivity of STAT1 Ser727 phosphorylation to OA is consistent with PHLPP1  
323 directly dephosphorylating this site in cells, a reaction it catalyzes *in vitro*. Furthermore, although  
324 PHLPP1 does suppress the signaling output of Akt (by dephosphorylating Ser473 (Gao et al.,  
325 2005)) and Erk (by reducing the steady-state levels of RTKs (Reyes et al., 2014)), its effect on  
326 STAT1 is unlikely to involve either of these targets because the activities of both kinases are  
327 sensitive to OA. Nor are the effects on Ser727 a result of PHLPP1 reducing PKC steady-state  
328 levels (Baffi et al., 2019), as the general PKC inhibitor Gö6983 did not alter GAS promoter  
329 activity (**Figure S4**). Third, genetic depletion of either PHLPP1 or STAT1 has opposing effects  
330 on transcriptional targets of STAT1: whereas KLA causes a larger increase in mRNA of *Cd69*,  
331 *Ifit2*, and *Gbp5* in BMDMs from *Phlpp1*<sup>-/-</sup> mice compared to WT mice, a reduction in these  
332 transcripts is observed upon STAT1 knockdown. Lastly, we have previously shown that PHLPP1  
333 regulates transcription of genes and binds chromatin (Reyes et al., 2014). Cumulatively, these  
334 data are consistent with PHLPP1 being the major phosphatase to oppose the activating  
335 phosphorylation of STAT1 on Ser727, thereby limiting its transcriptional activity.



336 The interaction of PHLPP1 with STAT1, mediated by its NTE, affords fidelity and  
337 specificity in its dephosphorylation of the transcription factor. PHLPP1 binding to STAT1 is  
338 consistent with this multi-valent protein utilizing its protein-interaction domains to position it  
339 near its substrates, either via direct interaction or by binding protein scaffolds, such as PDZ  
340 domain proteins that coordinate Akt signaling (Li et al., 2011). Such coordination is essential for  
341 its dephosphorylation of relevant substrates, in part due to the low catalytic activity of the  
342 phosphatase (approximately 1 reaction per sec towards peptide substrates, an order of magnitude  
343 lower than that of the related phosphatase PP2C $\alpha$  (Sierecki and Newton, 2014)). The importance  
344 of enzyme proximity to its substrate is best illustrated with Akt, where deletion of the last 3  
345 amino acids of PHLPP1 to remove the PDZ ligand abolishes the ability of PHLPP1 to  
346 dephosphorylate Akt in cells (Gao et al., 2005). Thus, binding of PHLPP1 via its NTE to STAT1  
347 affords an efficient mechanism to restrict its activity by directly opposing its phosphorylation in  
348 the nucleus (see **Figure 8**).

349 The regulation of STAT1 by PHLPP1 occurs in the nucleus, and we identify motifs in the  
350 phosphatase that control both the entry into (NLS) and exit from (NES) the nucleus. First, we  
351 identify a bipartite NLS in the NTE of PHLPP1 whose integrity is necessary for the phosphatase  
352 to regulate the transcriptional activity of STAT1. Second, we identify an NES in the segment  
353 between the LRR and PP2C domain that drives export out of the nucleus. Under the  
354 ‘unstimulated’ conditions of our immunocytochemistry, PHLPP1 localized primarily to the  
355 cytosol, suggesting masking of the NLS and exposure of the NES. Inputs that regulate the  
356 exposure of the NLS and NES are likely important regulators of PHLPP1 function.

357 Our transcriptomic data support a key role for PHLPP1 in the resolution of the  
358 inflammatory response specific to genes downstream of type II IFN signaling pathways. This

359 suggests the possibility that PHLPP1 can selectively discriminate between inflammatory  
360 promoters that are differentially regulated by distinct transcription factor families. Surprisingly,  
361 over 50% of the inflammatory genes that fail to properly resolve in the macrophages from  
362 *Phlpp1*<sup>-/-</sup> mice contain a consensus STAT-binding motif in their proximal promoters. Our studies  
363 have demonstrated a direct interaction between PHLPP1 and STAT1, thus it is highly likely that  
364 PHLPP1 is recruited to gene promoters through its association with STAT1. Elevated STAT1  
365 occupancy and delayed dismissal kinetics of STAT1 from its target promoters in *Phlpp1*<sup>-/-</sup>  
366 macrophages indicate a major function of PHLPP1-dependent dephosphorylation in termination  
367 of STAT1 signaling and its dismissal from chromatin.

368 Germline mutations that impair STAT1 function, by reducing either Tyr701 phosphorylation  
369 (L706S) or DNA binding (Q463H and E320Q), increase the susceptibility of otherwise healthy  
370 patients to mycobacterial and viral infection (Chapgier et al., 2006; Dupuis et al., 2001). This  
371 increased susceptibility was proposed to arise because of reduced transcription of genes involved  
372 in bacterial and viral immunity from the GAS and ISRE promoters, respectively. Similarly,  
373 genetic ablation of *STAT1* on the background of a mouse that has enhanced TLR4 signaling  
374 (because of deletion of *gp130*, a key regulator of systemic inflammatory responses during LPS-  
375 mediated endotoxemia) provides protection against LPS-induced toxemic death compared to  
376 mice with normal STAT1 levels (Luu et al., 2014). Given the protective effect of PHLPP1 loss  
377 on both *E. coli*-induced sepsis and LPS-induced endotoxemia in mice, it is possible that PHLPP1  
378 inhibitors could be explored as adjunctive therapies to antibiotics and supportive care of patients  
379 with Gram-negative sepsis, a leading cause of mortality in intensive care units.

## 380 **EXPERIMENTAL PROCEDURES**

### 381 **Materials and Antibodies**

382 OA (459616) was purchased from Millipore. Gö6983 (365251) and staurosporine (569397) were  
383 purchased from Calbiochem. Antibody against HA (11867425001) was purchased from Roche;  
384 antibodies against GFP (2555), STAT1 (9172), phosphorylated Ser727 on STAT1 (9177),  
385 phosphorylated Tyr701 on STAT1 (7649), phosphorylated Thr202/Tyr204 on Erk1/2 (9101),  
386 total Erk1/2 (9102), and phosphorylated Thr308 on Akt (9275) were purchased from Cell  
387 Signaling. Antibody against total Akt (126811) was obtained from AbCam. Antibodies against  
388 PHLPP1 were purchased from Cosmo (KIAA0606) and Proteintech (22789-1-AP); antibodies  
389 against FLAG (F3165),  $\beta$ -Actin (A2228), and  $\alpha$ -tubulin (T6074) were purchased from Sigma-  
390 Aldrich. The pcDNA3 HA-tagged PHLPP1 and PHLPP2 constructs for mammalian cell  
391 expression were described previously (Brognard et al., 2007; Gao et al., 2008; Gao et al., 2005).  
392 Full-length PHLPP1 was cloned into pCMV 3xFLAG vector (Sigma-Aldrich, E4401). An NLS  
393 was cloned to the N-terminus of the PP2C domain of PHLPP1. A double mutant of NLS-PP2C at  
394 residues D1210A and D1413A was cloned by site-directed mutagenesis. The HA-tagged  
395 PHLPP1 N-terminal extension (PHLPP1 NTE), residues 1-512, was cloned into pcDNA3 vector  
396 (Invitrogen). The NLS1 and NLS2 mutations were cloned by site-directed mutagenesis into HA-  
397 PHLPP1 NTE. The NES from PKI (LALKLALDI) was cloned into the N-terminus of HA-  
398 PHLPP1 NTE. The PHLPP1 NES mutant was generated by site-directed mutagenesis.

### 399 **Isolation and treatment of macrophages**

400 Primary BMDM cells were isolated from male 6- to 8-week-old C57BL/6 mice (Charles River  
401 Laboratories). BMDMs were obtained by PBS flush of femurs and tibias (Weischenfeldt and  
402 Porse, 2008), red blood cells lysed, and remaining cells plated in RPMI 1640 supplemented with

403 20% fetal bovine serum (FBS, Gibco, cat. 12657-029), 30% L-cell conditioned medium, 100  
404 U/ml penicillin, 100 µg/ml streptomycin, and 2 mM L-glutamine. Cells were seeded in non-  
405 tissue culture treated Optilux Petri dishes (BD Biosciences), incubated at 37 °C in a 5% CO<sub>2</sub>  
406 atmosphere for 7 days, then treated with 100 ng/ml KLA (699500, Avanti Polar Lipids) for noted  
407 times. Peritoneal macrophages were collected by flushing mouse peritoneal cavities with PBS  
408 following 48 hours post peritoneal injection with 3 ml of thioglycolate (Ray and Dittel, 2010).

#### 409 **Cell culture**

410 MEFs from WT or *Phlpp1*<sup>-/-</sup> mice stably expressing shp53 were a kind gift from Lloyd Trotman  
411 (CSHL) and have been described previously (Chen et al., 2011); MEFs, HEK-293T, and HeLa  
412 cells were grown in Dulbecco's modified Eagle medium (DMEM, 10-013-CV, Corning)  
413 supplemented with 10% fetal bovine serum (S11150, Atlanta biologicals) and 1%  
414 penicillin/streptomycin (15140-122, Gibco) at 37 °C in 5% (vol/vol) CO<sub>2</sub>.

#### 415 **mRNA isolation and qPCR analysis:**

416 RNA was purified using Direct-zol RNA Miniprep Kits (Zymo Research) from triplicate  
417 experiments and quantified using a NanoDrop Spectrophotometer (ThermoFisher Scientific).  
418 RNA was either reverse transcribed into cDNA for quantitative real-time PCR using gene-  
419 specific primers or used for next-generation library preparation. For cDNA generation, one µg of  
420 total mRNA was reverse transcribed using the SuperScript III Reverse Transcriptase  
421 (ThermoFisher Scientific). The resulting cDNA (25 ng) was used to perform real-time PCR  
422 using SYBR Green Master Mix (ThermoFisher Scientific) and 50 nM mix of forward and  
423 reverse primers. The real-time PCR values for individual genes were normalized to the house  
424 keeping gene, 36B4, using the  $\Delta\Delta CT$  method (Livak and Schmittgen, 2001). The primer  
425 sequences used in this study are:

426 *36B4\_qPCR\_F* AATCTCCAGAGGCACCATTG  
427 *36B4\_qPCR\_R* CCGATCTGCAGACACAACT  
*Cd69\_qPCR\_F* CTATCCCTTGGGCTGTGTTAAT  
*Cd69\_qPCR\_R* ACATGGTGGTCAGATGATTCC  
*Ifit2\_qPCR\_F* GAGTTTGAGGACAGGGTGTTTA  
*Ifit2\_qPCR\_R* AGACCTCTGCAGTGCTTTAC  
*Gbp5\_qPCR\_F* GGAAGTGCTGCAGACCTATT  
*Gbp5\_qPCR\_R* GCTCTTTCTTGTTCCGCTTTAC

#### 428 **Next-generation sequence library preparation and analysis**

429 Libraries were prepared from 2 biological replicates per condition. RNA-Seq libraries were  
430 prepared as previously described (Kaikkonen et al., 2013). Sequencing libraries were prepared  
431 using magnetic beads similar to described previously using barcoded adapters (NextFlex, Bioo  
432 Scientific) (Garber et al., 2012). Libraries were sequenced for 36 or 50 cycles on an Illumina  
433 Genome Analyzer II or HiSeq 2000, respectively, according to the manufacturer's instructions.  
434 mRNA-Seq results were trimmed to remove A-stretches originating from the library preparation.  
435 Each sequence tag returned by the Illumina Pipeline was aligned to the mm10 assembly using  
436 ELAND allowing up to 2 mismatches. Only tags that mapped uniquely to the genome were  
437 considered for further analysis. Peak finding, MOTIF discovery, and downstream analysis was  
438 performed using HOMER, a software suite created for analysis of high-throughput sequencing  
439 data (Heinz et al., 2010). Detailed instructions for analysis can be found at  
440 <http://homer.ucsd.edu/homer/>. Data visualization was performed using Microsoft Excel,  
441 JavaTreeGraph and software packages available in R.

#### 442 **RNA interference experiments**

443 SMART siRNA pools for examined genes were purchased from Dharmacon (Control: D-  
444 001810-10-05, *Stat1*: L-058881). Thioglycollate-elicited peritoneal macrophages were  
445 transfected with 30 nM siRNA for 48 h using Deliver X (Affymetrix) according to the  
446 manufacturer's instructions prior to being stimulated with KLA for designated times.

#### 447 **Chromatin immunoprecipitation**

448 ChIP assays were performed as described before (Stender et al., 2017). Cells were crosslinked  
449 with 2 mM disuccinimidyl glutarate for 30 min prior to 10 min treatment with 1% formaldehyde.  
450 The antibodies used in these studies were: STAT1 (sc-345, Santa Cruz Biotechnology). For the  
451 precipitations protein A Dynabeads (10003D, Invitrogen) were coated with antibody prior to  
452 pulldown and excess antibody was washed away. Pulldowns occurred while rotating for 16 h at 4  
453 °C. Beads were then washed with TSE I (20 mM Tris/HCl pH 7.4 at 20 °C, 150 mM NaCl, 0.1%  
454 SDS, 1% Triton X-100, 2 mM EDTA), twice with TSE III (10 mM Tris/HCl pH 7.4 at 20 °C,  
455 250 mM LiCl, 1% IGEPAL CA-630, 0.7% Deoxycholate, 1 mM EDTA), and twice with TE  
456 followed by elution from the beads using elution buffer (0.1 M NaHCO<sub>3</sub>, 1% SDS). Elutions  
457 were subsequently de-crosslinked overnight at 65 °C and DNA was purified using ChIP DNA  
458 Clean and Concentrator (Zymo Research) and DNA was used for qPCR. The primer sequences  
459 used in this study are:

*Cd69*\_ChIP\_F TCCCTGCTGTCTGAAATGTG

*Cd69*\_ChIP\_R GTGGAAGGATGTCTTCGATTCT

*Ifit2*\_ChIP\_F GCATTGTGCAAGGAGAATTCTATG

*Ifit2*\_ChIP\_R TTCCGGAATTGGGAGAGAGA

*Gbp5*\_ChIP\_F TAAACAGCGCTTGAAACAATGA

*Gbp5*\_ChIP\_R AGGCTTGAATGTCACTGAACTA

#### 460 **Luciferase assay**

461 Cells were plated in a 96-well plate and transfected when approximately 80% confluent.  
462 Transfections of pRL-CMV encoding Renilla luciferase (Heinz et al., 2010), together with a  
463 firefly luciferase promoter-reporter construct containing eight GAS consensus sequences (Horvai  
464 et al., 1997), control vector, or the indicated PHLPP constructs, were performed using  
465 Lipofectamine 3000 reagent (Invitrogen, L3000) for MEFs or Fugene 6 reagent (Promega,  
466 E269A) for HEK-293T cells. Cells were treated with murine or human IFN $\gamma$  (PeproTech, 315-  
467 05, 300-02, respectively) for the indicated times at 37 °C and activity was measured using the  
468 Dual-Glo Luciferase Assay System (Promega, E2940) in a Tecan Infinite M200 Pro multi-well  
469 plate reader. Promoter activity was corrected for the luciferase activity of the internal control  
470 plasmid, pRL-CMV, and Relative Response Ratios (RRR) were calculated.

#### 471 **Immunoprecipitation and western blot**

472 DNA was transfected into HEK-293T cells using FuGene 6. Cells were collected 24 h post-  
473 transfection and then lysed in a buffer containing 50 mM Na<sub>2</sub>HPO<sub>4</sub> (pH 7.5), 1 mM sodium  
474 pyrophosphate, 20 mM NaF, 2 mM EDTA, 2 mM EGTA, 1% SDS, 1 mM DTT, 1  $\mu$ M  
475 microcystin, 20  $\mu$ M benzamidine, 40  $\mu$ g/ml leupeptin, and 1 mM PMSF and then were sonicated  
476 briefly. For co-immunoprecipitation, cells were lysed and the detergent-solubilized cell lysates  
477 were incubated with an anti-HA antibody (BioLegend, 901503) at 4 °C overnight. Samples were  
478 incubated with protein A/G PLUS-Agarose (Santa Cruz Cat sc-2003) for 1 h at 4 °C and washed  
479 three times in lysis buffer containing 0.3 M NaCl and 0.1% Triton X 100. Bound proteins and  
480 lysates were separated by SDS/PAGE gel and analyzed by western blot.

#### 481 **Immunofluorescence**

482 HeLa cells were plated on glass coverslips and transfected using FuGene 6. 24 h after  
483 transfection, cells were fixed with 4% paraformaldehyde for 20 min at room temperature,  
484 followed by fixation with 100% methanol for 3 min at -20 °C. Cells were permeabilized and  
485 blocked in 0.3% Triton X 100 and 3% BSA for 30 min at room temperature, followed by three 5-  
486 min washes in PBS-T. Primary antibodies were diluted at the following dilutions: mouse anti-  
487 HA, 1:500; rabbit anti- $\alpha$ -tubulin (Cell Signaling, 2125), 1:200. Secondary antibodies were  
488 diluted at the following dilutions: Alexa647 anti-mouse (Life Technologies, A21235), 1:500;  
489 Alexa488 anti-rabbit (Life Technologies, A11034), 1:500. Coverslips were mounted onto slides  
490 with ProLong Diamond Antifade Mountant with DAPI (ThermoFisher, P36966). Images were  
491 acquired on a Zeiss Axiovert 200M microscope (Carl Zeiss Microimaging Inc.) using an iXon  
492 Ultra 888 EMCCD camera (ANDOR) controlled by MetaFluor software (Molecular Devices)  
493 and analyzed on ImageJ (NIH). The Nuclear to Cytoplasmic ratio was calculated as follows: the  
494 mean signal intensity was measured for a region of the nucleus and cytoplasm for each cell, and  
495 the mean signal intensity of the background was subtracted from these values. Then the Nuclear  
496 to Cytoplasmic ratio was calculated by dividing the background subtracted mean signal intensity  
497 for the nuclear signal by the background subtracted value for the cytoplasmic signal.

#### 498 ***In vitro* phosphatase assay**

499 pCMV 3xFLAG PHLPP1 was transfected into HEK-293T cells plated in four 10 cm plates  
500 (approximately  $9 \times 10^6$  cells per plate, 80% transfection efficiency) using Fugene 6. Cells were  
501 collected 48 h post-transfection and lysed in a buffer containing 20 mM Tris (pH 7.5), 150 mM  
502 NaCl, 1 mM EDTA, 1 mM EGTA, 1% Triton X 100, 2.5 mM sodium pyrophosphate, 1 mM  
503  $\text{Na}_3\text{VO}_4$ , 1 mM DTT, 1 mM PMSF 1  $\mu\text{M}$  microcystin, 20  $\mu\text{M}$  benzamidine, and 40  $\mu\text{g/ml}$   
504 leupeptin. The detergent-solubilized cell lysates were incubated with anti-FLAG M2 affinity gel



505 (30  $\mu$ l per plate, Sigma-Aldrich, A2220) for 1 h at 4 °C, washed four times in lysis buffer and the  
506 beads were resuspended in 40  $\mu$ l 200 mM Tris, 4 mM DTT, 20 mM  $MnCl_2$  for use in *in vitro*  
507 phosphatase assay. STAT1 (0.3  $\mu$ M) (Biosource, PHF0011) was phosphorylated *in vitro* by  
508 incubation with recombinant human cdk1/cyclinB (0.2  $\mu$ M) (Millipore, 14-450) at 30 °C for 90  
509 min in the presence of 1 mM ATP, and 1 X PK buffer (NEB, B6022) containing 50 mM Tris, 10  
510 mM  $MgCl_2$ , 0.1 mM EDTA, 2 mM DTT, 0.01% Brij, pH 7.5, and the reaction was quenched by  
511 addition of 144  $\mu$ M CDK1 inhibitor RO3306 (Enzo, ALX-270-463). Phosphorylated STAT1  
512 substrate was added to 1/4 volume of beads with bound PHLPP1 (or to lysis buffer control) and  
513 reactions were allowed to proceed for an additional 120 min at 30 °C. For the zero minute time  
514 point, beads were added after the 120 min incubation and all reactions were immediately  
515 quenched with 4xSB (sample buffer). Samples were analyzed by western blot.

#### 516 **Mouse infection and endotoxin challenge**

517 Bacterial sepsis in mice was induced by injection of *E. coli* K1 strain RS218 and LPS  
518 endotoxemia was induced by injection of purified *E. coli* O111:B4 LPS (Sigma-Aldrich). The *E.*  
519 *coli* culture was grown overnight in Luria broth (LB) medium (Hardy Diagnostics) at 37°C with  
520 shaking. The bacterial culture was diluted 1:50 in fresh LB, grown to mid-log phase, washed  
521 twice with PBS and reconstituted in PBS to yield the appropriate inoculum. For survival  
522 experiments, 10 to 14-week-old female C57BL/6 WT and littermate control *Phlpp1*<sup>-/-</sup> mice were  
523 injected i.p. with  $5 \times 10^7$  colony forming units (cfu) *E. coli* or 15 mg/kg LPS and mouse survival  
524 recorded for 10 days following injection. For measurement of serum IL-6, IL-10 and IL-1 $\beta$   
525 levels, mice were injected with 10 mg/kg LPS, and at 4, 8, 12 and 24 h after injection, 80  $\mu$ l of  
526 blood was collected by submandibular bleeding using a lancet into a serum separating blood  
527 collection tubes (BD) that were spun at  $1500 \times g$  for 10 min to separate serum. Serum cytokines

528 were quantified by specific ELISA (R&D) following the manufacturer's protocol. All protocols  
529 for mouse experiments were conducted in accordance with the institutional guidelines and were  
530 approved by the Institutional Animal Care and Usage Committee (IACUC) at the University of  
531 California, San Diego.

532

### 533 **SUPPLEMENTAL INFORMATION**

534 Supplemental Information includes Extended Experimental Procedures, four figures, and two  
535 tables and can be found with this article online.

### 536 **AUTHOR CONTRIBUTIONS**

537 K.C.-K., J.D.S., S.U., A.T.K., and G. L. performed the experiments. K.C.-K., J.D.S., and A.C.N.  
538 wrote the manuscript. K.C.-K., J.D.S., A.T.K, G. L., S.U., V.N., C.K.G. and A.C.N. conceived  
539 the project.

### 540 **ACKNOWLEDGMENTS**

541 We thank Maya Kunkel for advice and Mira Sastri, Gregory Fonseca, and Ali Syed for  
542 assistance with reagents and methodologies. This work was supported by NIH R35 GM122523  
543 (A.C.N.), NIH GM067946 (A.C.N.), NIH HL125352 (V.N.), NIH DK091183 (C.K.G.) and  
544 DK063491 (C.K.G.). K.C.-K. was supported in part by NIH/NCI T32 CA009523 and A.T.K.  
545 was supported in part by the University of California San Diego Graduate Training Grant in  
546 Cellular and Molecular Pharmacology through the National Institutes of Health Institutional  
547 Training Grant T32 GM007752 from the NIGMS.

## 548 References

- 549 Alamuru, N.P., Behera, S., Butchar, J.P., Tridandapani, S., Kaimal Suraj, S., Babu, P.P., Hasnain, S.E.,  
550 Ehtesham, N.Z., and Parsa, K.V. (2014). A novel immunomodulatory function of PHLPP1: inhibition of  
551 iNOS via attenuation of STAT1 ser727 phosphorylation in mouse macrophages. *J Leukoc Biol* *95*, 775-  
552 783.
- 553 Baffi, T.R., Van, A.N., Zhao, W., Mills, G.B., and Newton, A.C. (2019). Protein Kinase C Quality  
554 Control by Phosphatase PHLPP1 Unveils Loss-of-Function Mechanism in Cancer. *Molecular cell*.
- 555 Brognard, J., Sierceki, E., Gao, T., and Newton, A.C. (2007). PHLPP and a second isoform, PHLPP2,  
556 differentially attenuate the amplitude of Akt signaling by regulating distinct Akt isoforms. *Molecular cell*  
557 *25*, 917-931.
- 558 Chappier, A., Boisson-Dupuis, S., Jouanguy, E., Vogt, G., Feinberg, J., Prochnicka-Chalufour, A.,  
559 Casrouge, A., Yang, K., Soudais, C., Fieschi, C., *et al.* (2006). Novel STAT1 alleles in otherwise healthy  
560 patients with mycobacterial disease. *PLoS genetics* *2*, e131.
- 561 Chen, M., Pratt, C.P., Zeeman, M.E., Schultz, N., Taylor, B.S., O'Neill, A., Castillo-Martin, M., Nowak,  
562 D.G., Naguib, A., Grace, D.M., *et al.* (2011). Identification of PHLPP1 as a tumor suppressor reveals the  
563 role of feedback activation in PTEN-mutant prostate cancer progression. *Cancer cell* *20*, 173-186.
- 564 Chen, M.J., Dixon, J.E., and Manning, G. (2017). Genomics and evolution of protein phosphatases.  
565 *Science signaling* *10*.
- 566 Coussens, L.M., and Werb, Z. (2002). Inflammation and cancer. *Nature* *420*, 860-867.
- 567 Darnell, J.E., Jr. (1997). STATs and gene regulation. *Science* *277*, 1630-1635.
- 568 Darnell, J.E., Jr., Kerr, I.M., and Stark, G.R. (1994). Jak-STAT pathways and transcriptional activation in  
569 response to IFNs and other extracellular signaling proteins. *Science* *264*, 1415-1421.
- 570 Dawson, M.A., and Kouzarides, T. (2012). Cancer epigenetics: from mechanism to therapy. *Cell* *150*, 12-  
571 27.
- 572 Dupuis, S., Dargemont, C., Fieschi, C., Thomassin, N., Rosenzweig, S., Harris, J., Holland, S.M.,  
573 Schreiber, R.D., and Casanova, J.L. (2001). Impairment of mycobacterial but not viral immunity by a  
574 germline human STAT1 mutation. *Science* *293*, 300-303.
- 575 Flavahan, W.A., Gaskell, E., and Bernstein, B.E. (2017). Epigenetic plasticity and the hallmarks of  
576 cancer. *Science* *357*.
- 577 Fu, S.C., Imai, K., and Horton, P. (2011). Prediction of leucine-rich nuclear export signal containing  
578 proteins with NESsential. *Nucleic acids research* *39*, e111.
- 579 Fullerton, J.N., and Gilroy, D.W. (2016). Resolution of inflammation: a new therapeutic frontier. *Nat Rev*  
580 *Drug Discov* *15*, 551-567.
- 581 Gao, T., Brognard, J., and Newton, A.C. (2008). The phosphatase PHLPP controls the cellular levels of  
582 protein kinase C. *The Journal of biological chemistry* *283*, 6300-6311.
- 583 Gao, T., Furnari, F., and Newton, A.C. (2005). PHLPP: a phosphatase that directly dephosphorylates Akt,  
584 promotes apoptosis, and suppresses tumor growth. *Molecular cell* *18*, 13-24.
- 585 Garber, M., Yosef, N., Goren, A., Raychowdhury, R., Thielke, A., Guttman, M., Robinson, J., Minie, B.,  
586 Chevrier, N., Itzhaki, Z., *et al.* (2012). A high-throughput chromatin immunoprecipitation approach  
587 reveals principles of dynamic gene regulation in mammals. *Molecular cell* *47*, 810-822.
- 588 Grivennikov, S.I., Greten, F.R., and Karin, M. (2010). Immunity, inflammation, and cancer. *Cell* *140*,  
589 883-899.
- 590 Grzechnik, A.T., and Newton, A.C. (2016). PHLPPing through history: a decade in the life of PHLPP  
591 phosphatases. *Biochemical Society transactions* *44*, 1675-1682.
- 592 Hein, M.Y., Hubner, N.C., Poser, I., Cox, J., Nagaraj, N., Toyoda, Y., Gak, I.A., Weisswange, I.,  
593 Mansfeld, J., Buchholz, F., *et al.* (2015). A human interactome in three quantitative dimensions organized  
594 by stoichiometries and abundances. *Cell* *163*, 712-723.
- 595 Heinz, S., Benner, C., Spann, N., Bertolino, E., Lin, Y.C., Laslo, P., Cheng, J.X., Murre, C., Singh, H.,  
596 and Glass, C.K. (2010). Simple combinations of lineage-determining transcription factors prime cis-  
597 regulatory elements required for macrophage and B cell identities. *Molecular cell* *38*, 576-589.

598 Horvai, A.E., Xu, L., Korzus, E., Brard, G., Kalafus, D., Mullen, T.M., Rose, D.W., Rosenfeld, M.G., and  
599 Glass, C.K. (1997). Nuclear integration of JAK/STAT and Ras/AP-1 signaling by CBP and p300.  
600 *Proceedings of the National Academy of Sciences of the United States of America* *94*, 1074-1079.  
601 Jernberg, E., Bergh, A., and Wikstrom, P. (2017). Clinical relevance of androgen receptor alterations in  
602 prostate cancer. *Endocr Connect* *6*, R146-R161.  
603 Kaikkonen, M.U., Spann, N.J., Heinz, S., Romanoski, C.E., Allison, K.A., Stender, J.D., Chun, H.B.,  
604 Tough, D.F., Prinjha, R.K., Benner, C., *et al.* (2013). Remodeling of the enhancer landscape during  
605 macrophage activation is coupled to enhancer transcription. *Molecular cell* *51*, 310-325.  
606 Kalkat, M., De Melo, J., Hickman, K.A., Lourenco, C., Redel, C., Resetca, D., Tamachi, A., Tu, W.B.,  
607 and Penn, L.Z. (2017). MYC Deregulation in Primary Human Cancers. *Genes (Basel)* *8*.  
608 Karin, M., Lawrence, T., and Nizet, V. (2006). Innate immunity gone awry: linking microbial infections  
609 to chronic inflammation and cancer. *Cell* *124*, 823-835.  
610 Li, X., Yang, H., Liu, J., Schmidt, M.D., and Gao, T. (2011). Scribble-mediated membrane targeting of  
611 PHLPP1 is required for its negative regulation of Akt. *EMBO Rep* *12*, 818-824.  
612 Lin, J.R., and Hu, J. (2013). SeqNLS: nuclear localization signal prediction based on frequent pattern  
613 mining and linear motif scoring. *PloS one* *8*, e76864.  
614 Liu, J., Weiss, H.L., Rychahou, P., Jackson, L.N., Evers, B.M., and Gao, T. (2009). Loss of PHLPP  
615 expression in colon cancer: role in proliferation and tumorigenesis. *Oncogene* *28*, 994-1004.  
616 Livak, K.J., and Schmittgen, T.D. (2001). Analysis of relative gene expression data using real-time  
617 quantitative PCR and the 2(-Delta Delta C(T)) Method. *Methods* *25*, 402-408.  
618 Luu, K., Greenhill, C.J., Majoros, A., Decker, T., Jenkins, B.J., and Mansell, A. (2014). STAT1 plays a  
619 role in TLR signal transduction and inflammatory responses. *Immunol Cell Biol* *92*, 761-769.  
620 O'Neill, L.A., Golenbock, D., and Bowie, A.G. (2013). The history of Toll-like receptors - redefining  
621 innate immunity. *Nature reviews. Immunology* *13*, 453-460.  
622 O'Shea, J.J., and Murray, P.J. (2008). Cytokine signaling modules in inflammatory responses. *Immunity*  
623 *28*, 477-487.  
624 Ohmori, Y., and Hamilton, T.A. (2001). Requirement for STAT1 in LPS-induced gene expression in  
625 macrophages. *J Leukoc Biol* *69*, 598-604.  
626 Oishi, Y., Spann, N.J., Link, V.M., Muse, E.D., Strid, T., Edillor, C., Kolar, M.J., Matsuzaka, T.,  
627 Hayakawa, S., Tao, J., *et al.* (2017). SREBP1 Contributes to Resolution of Pro-inflammatory TLR4  
628 Signaling by Reprogramming Fatty Acid Metabolism. *Cell metabolism* *25*, 412-427.  
629 Patterson, S.J., Han, J.M., Garcia, R., Assi, K., Gao, T., O'Neill, A., Newton, A.C., and Levings, M.K.  
630 (2011). Cutting edge: PHLPP regulates the development, function, and molecular signaling pathways of  
631 regulatory T cells. *J Immunol* *186*, 5533-5537.  
632 Pejerrey, S.M., Dustin, D., Kim, J.A., Gu, G., Rechoum, Y., and Fuqua, S.A.W. (2018). The Impact of  
633 ESR1 Mutations on the Treatment of Metastatic Breast Cancer. *Horm Cancer*.  
634 Platanias, L.C. (2005). Mechanisms of type-I- and type-II-interferon-mediated signalling. *Nat Rev*  
635 *Immunol* *5*, 375-386.  
636 Ray, A., and Dittel, B.N. (2010). Isolation of mouse peritoneal cavity cells. *J Vis Exp*.  
637 Reyes, G., Niederst, M., Cohen-Katsenelson, K., Stender, J.D., Kunkel, M.T., Chen, M., Brognard, J.,  
638 Sierecki, E., Gao, T., Nowak, D.G., *et al.* (2014). Pleckstrin homology domain leucine-rich repeat protein  
639 phosphatases set the amplitude of receptor tyrosine kinase output. *Proceedings of the National Academy*  
640 *of Sciences of the United States of America* *111*, E3957-3965.  
641 Rossetto, D., Avvakumov, N., and Cote, J. (2012). Histone phosphorylation: a chromatin modification  
642 involved in diverse nuclear events. *Epigenetics : official journal of the DNA Methylation Society* *7*, 1098-  
643 1108.  
644 Sabapathy, K., and Lane, D.P. (2018). Therapeutic targeting of p53: all mutants are equal, but some  
645 mutants are more equal than others. *Nat Rev Clin Oncol* *15*, 13-30.  
646 Sadzak, I., Schiff, M., Gattermeier, I., Glinitzer, R., Sauer, I., Saalmuller, A., Yang, E., Schaljo, B., and  
647 Kovarik, P. (2008). Recruitment of Stat1 to chromatin is required for interferon-induced serine

648 phosphorylation of Stat1 transactivation domain. *Proceedings of the National Academy of Sciences of the*  
649 *United States of America* *105*, 8944-8949.

650 Sierecki, E., and Newton, A.C. (2014). Biochemical characterization of the phosphatase domain of the  
651 tumor suppressor PH domain leucine-rich repeat protein phosphatase. *Biochemistry* *53*, 3971-3981.

652 Stark, G.R., and Darnell, J.E., Jr. (2012). The JAK-STAT pathway at twenty. *Immunity* *36*, 503-514.

653 Stender, J.D., Nwachukwu, J.C., Kastrati, I., Kim, Y., Strid, T., Yakir, M., Srinivasan, S., Nowak, J.,  
654 IZard, T., Rangarajan, E.S., *et al.* (2017). Structural and Molecular Mechanisms of Cytokine-Mediated  
655 Endocrine Resistance in Human Breast Cancer Cells. *Molecular cell* *65*, 1122-1135 e1125.

656 Weischenfeldt, J., and Porse, B. (2008). Bone Marrow-Derived Macrophages (BMM): Isolation and  
657 Applications. *CSH Protoc* *2008*, pdb prot5080.

658 Wen, W., Meinkoth, J.L., Tsien, R.Y., and Taylor, S.S. (1995a). Identification of a signal for rapid export  
659 of proteins from the nucleus. *Cell* *82*, 463-473.

660 Wen, Z., Zhong, Z., and Darnell, J.E., Jr. (1995b). Maximal activation of transcription by Stat1 and Stat3  
661 requires both tyrosine and serine phosphorylation. *Cell* *82*, 241-250.

662 Whitmarsh, A.J., and Davis, R.J. (2000). Regulation of transcription factor function by phosphorylation.  
663 *Cellular and molecular life sciences : CMLS* *57*, 1172-1183.

664 Wynn, T.A., and Vannella, K.M. (2016). Macrophages in Tissue Repair, Regeneration, and Fibrosis.  
665 *Immunity* *44*, 450-462.

666

667

668 **FIGURE LEGENDS**

669 **Figure 1**

670 PHLPP1 knock-out mice are protected against sepsis-induced death. **(A)** Survival curve of WT  
671 and *Phlpp1*<sup>-/-</sup> mice i.p. infected with 1x10<sup>7</sup> cfu of *E. coli*. Values are expressed as percent  
672 survival of 15 mice for each genotype. \*\* p < 0.01 by log-rank test. **(B)** Survival curve of WT  
673 and *Phlpp1*<sup>-/-</sup> mice i.p. injected with 15 mg/kg LPS. Values are expressed as percent survival of  
674 16 mice for each genotype. \* p < 0.04 by log-rank test. **(C-E)** ELISA showing IL-6 **(C)**, IL-1β  
675 **(D)** and IL-10 **(E)** levels in serum at the indicated times after i.p. injection of 10 mg/kg LPS.  
676 Data represent mean ± SEM. Statistics analyzed by Student's *t*-test \*p < 0.05, \*\*p < 0.01.

677 **Figure 2**

678 Loss of PHLPP1 modulates the expression of inflammatory genes in macrophages. **(A)** Heat map  
679 for mRNA-Seq expression of the 1,654 mRNA transcripts regulated greater than two-fold with a  
680 FDR < 0.05 in BMDMs isolated from WT or *Phlpp1*<sup>-/-</sup> animals treated with 100 ng/ml KLA for  
681 1, 6 or 24 h. Data represent the log<sub>2</sub> difference between the mRNA expression in *Phlpp1*<sup>-/-</sup>  
682 macrophages compared to wild-type macrophages. **(B)** Gene ontology analysis for the 199  
683 elevated (red arrow) or 144 decreased (blue arrow) transcripts in *Phlpp1*<sup>-/-</sup> macrophages  
684 compared to wild-type macrophages. **(C)** *De novo* motif analysis using HOMER  
685 (Hypergeometric Optimization of Motif EnRichment) for the 199 promoters corresponding to the  
686 genes elevated in the *Phlpp1*<sup>-/-</sup> macrophages. **(D)** Pie graph showing the percentage of promoters  
687 of elevated genes that contain STAT or IRF binding motifs. **(E-G)** Normalized mRNA-Seq  
688 values for **(E)** *Cd69* **(F)** *Ifit2* and **(G)** *Gbp5* mRNA in BMDMs isolated from WT or *Phlpp1*<sup>-/-</sup>  
689 animals treated with 100 ng/ml KLA for 0, 1, 6, or 24 h. RPKM – Reads Per Kilobase Million.

690 Values are expressed as mean  $\pm$  SEM. \* $p < 0.05$  (Student's *t*-test) compared to WT cells. See  
691 also Tables S1 and S2.

### 692 **Figure 3**

693 PHLPP1 controls STAT1 genomic recruitment and STAT1-dependent gene expression. (A-C)  
694 Quantitative PCR analysis for (A) *Cd69* (B) *Ifit2* and (C) *Gbp5* mRNA isolated from  
695 thioglycollate-elicited peritoneal macrophages treated with control siRNA (siCtl) or siRNA  
696 specifically targeting *Stat1* (siStat1) and subsequently treated with vehicle or 100 ng/ml KLA for  
697 6 or 24 h. Values are expressed as mean  $\pm$  SEM from replicate experiments. \* $p < 0.05$  (Student's  
698 *t*-test) compared to siCtl treated cells. (D-F) Quantitative PCR analysis of ChIPs for STAT1 at  
699 the (D) *Cd69* (E) *Ifit2* and (F) *Gbp5* promoter in BMDMs isolated from WT or *Phlpp1*<sup>-/-</sup> animals  
700 and treated with 100 ng/ml KLA for 0, 1, 6 or 24 h. Values are expressed as mean  $\pm$  SEM. \* $p <$   
701 0.05 (Student's *t*-test) compared to WT cells.

### 702 **Figure 4**

703 PHLPP1 regulates STAT1 phosphorylation on Ser727. (A) Western blot analysis of primary  
704 BMDM from WT or *Phlpp1*<sup>-/-</sup> mice treated with 100 ng/ml KLA for the indicated times and  
705 probed with the indicated antibodies. (B) Ratio of pSTAT1 (S727):total STAT1, pSTAT1  
706 (Y701):total STAT1 or phosphoERK (T202/Y204):total ERK normalized to the highest value;  
707 data represent the mean  $\pm$  SEM of five independent experiments as in (A). \*\*  $p < 0.01$  (Student's  
708 *t*-test) compared to WT cells. (C) Western blot analysis of an *in vitro* phosphatase assay of  
709 purified and phosphorylated STAT1 and immunoprecipitated FLAG-PHLPP1, incubated for 0  
710 and 120 min at 30 °C (on the left). On the right, quantification of pSTAT1 (S727) divided by  
711 total STAT1 and normalized to 0 time point. Values are expressed as mean  $\pm$  SEM of three

712 independent experiments. \*\*  $p < 0.01$  (Student's *t*-test). **(D)** Western blot analysis of HEK-293T  
713 cells over-expressing vector control (Vector) or HA-tagged PHLPP1 and treated with 10 ng/ml  
714 IFN $\gamma$  for 0, 1, 6, or 24 h. **(E)** Graphs represent the quantification of three independent  
715 experiments as presented in (D). Values are expressed as mean relative units of pSTAT1 (S727)  
716 or (Y701) divided by  $\beta$ -Actin and normalized to vector 0 h  $\pm$  SEM. \*  $p < 0.05$  (Student's *t*-test)  
717 compared to vector control expressing cells. See also Figure S1.

718

### 719 **Figure 5**

720 STAT1 Ser727 phosphorylation and transcriptional activity are insensitive to okadaic acid. **(A)**  
721 Western blot analysis of primary BMDMs from WT or *Phlpp1*<sup>-/-</sup> mice treated with 100 ng/ml  
722 KLA for 0 or 30 min followed by treatment with 1  $\mu$ M OA or DMSO control for an additional  
723 15 min. and probed with the indicated antibodies; pAkt antibody recognizes phosphorylated  
724 Thr308 **(B)** Graph represents the quantification of three independent experiments as presented in  
725 (A). Values are expressed as the mean  $\pm$  SEM of the ratio of pSTAT1 (S727) to total STAT1  
726 normalized to the highest value; \*  $p < 0.05$ , \*\*  $p < 0.01$  and n.s.- non-significant (Student's *t*-test).

### 727 **Figure 6**

728 PHLPP1 suppresses STAT1 transcriptional activity by a mechanism that depends on its catalytic  
729 activity and an NLS in its N-Terminal Extension **(A)** Luciferase reporter assay in WT (+/+) and  
730 *Phlpp1*<sup>-/-</sup> (-/-) MEFs over-expressing GAS luciferase reporter and treated with 10 ng/ml IFN $\gamma$  for  
731 0, 1, 6, or 24 h in combination with 1  $\mu$ M OA or DMSO control treatment for 15 minutes. Values  
732 are expressed as mean of relative light units (RLU)  $\pm$  SEM of three independent experiments. \* $p$   
733  $< 0.05$  (Student's *t*-test). See also Figure S1. **(B)** Schematic of HA-tagged PHLPP1 constructs  
734 used in this study: the PP2C domain of PHLPP1 (PP2C), nuclear targeted PP2C with NLS (NLS-



735 PP2C), NLS-PP2C with active site residues Asp1210 and Asp1413 residues mutated to Ala  
736 (NLS-PP2C DDAA), and full-length PHLPP1 (PHLPP1). (C) Luciferase reporter assay in HEK-  
737 293T cells over-expressing GAS luciferase reporter in combination with either vector control  
738 (vector, black) or the constructs described in (B) and treated with 10 ng/ml IFN $\gamma$  for 0, 1, 6, or 24  
739 h. Values are expressed as mean RLU  $\pm$  SEM of four independent experiments. All data points at  
740 24 h were significant against each other except for vector to PP2C, vector to NLS-PP2C DDAA,  
741 P1 to NLS-PP2C, and PP2C to NLS-PP2C DDAA. \*  $p < 0.05$ , \*\*  $p < 0.01$  (Student's *t*-test). (D)  
742 Schematic showing position and sequence of bipartite NLS in the NTE, and NLS mutants used in  
743 this study. (E) HeLa cells over-expressing the constructs used in Figure 6D were stained for HA  
744 (green),  $\alpha$ -Tubulin (red), and DAPI (blue). Scale bar indicates 15  $\mu$ m. (F) The Nuclear to  
745 Cytoplasmic ratio was calculated for each construct (300 cells per construct) and values are  
746 expressed as mean  $\pm$  SEM. All data points were significant against each other except for NLS1  
747 to NLS2, and NLS2 to NLS1/2. \*\*  $p < 0.01$ , n.s. – non-significant (Student's *t*-test). (G)  
748 Luciferase reporter assay in HEK-293T cells over-expressing a GAS luciferase reporter in  
749 combination with either vector control (vector, black) or the constructs described in (D) however  
750 in the context of a full-length PHLPP1 and treated with 10 ng/ml IFN $\gamma$  for 0, 1, 6, or 24 h.  
751 Values are expressed as mean RLU  $\pm$  SEM of eight independent experiments. \* $p < 0.05$ , \*\* $p <$   
752 0.01, n.s. - non-significant (Student's *t*-test).

### 753 **Figure 7**

754 (A) Luciferase reporter assay in HEK-293T cells over-expressing GAS luciferase reporter in  
755 combination with either vector control (Vector, black), PHLPP1 NTE (NTE, green),  
756 PHLPP1 $\Delta$ NTE (blue), or PHLPP1 (red) and treated with 10 ng/ml IFN $\gamma$  for 0, 1, 6, or 24 h.  
757 Values are expressed as mean of RLU  $\pm$  SEM of five independent experiments. All data points at

758 24 h were significant against each other except for vector to PHLPP1 $\Delta$ NTE, and PHLPP1 $\Delta$ NTE  
759 to PHLPP1. \*  $p < 0.05$ , \*\*  $p < 0.01$ , \*\*\*  $p < 0.001$  (Student's  $t$ -test). (B) Western blot analysis of  
760 detergent-solublized lysate of HEK-293T cells transfected with vector control (Vector), HA-  
761 tagged NTE of PHLPP1, PHLPP1 with the NTE deleted (P1 $\Delta$ NTE) or full-length PHLPP1 (HA-  
762 P1) and immunoprecipitated (IP) using HA antibody; blots were probed for co-IP of STAT1 tag  
763 using GFP antibody. (C) Quantification of GFP-STAT1 IP divided by HA IP and normalized to  
764 HA-NTE IP. Values are expressed as mean  $\pm$  SEM of three independent experiments. \*\*\*  $p <$   
765 0.001, \*\*\*\*  $p < 0.0001$  (Student's  $t$ -test).

766

## 767 **Figure 8**

768 Proposed model for PHLPP1-dependent suppression of STAT1 activity. Binding of IFN $\gamma$  to IFN  
769 receptors results in their dimerization and phosphorylation, promoting the recruitment of JAK,  
770 which phosphorylates STAT1 on Tyr701 by JAK. This promotes the dimerization of STAT1  
771 and its translocation into the nucleus where it binds the GAS promoter to allow the transcription  
772 of inflammatory response genes. Activity of STAT1 is enhanced by phosphorylation on Ser727.  
773 However, PHLPP1, which binds STAT1 via its N-terminal extension, tunes the activity of  
774 STAT1 by directly dephosphorylating this site to keep activity finely controlled. Loss of  
775 PHLPP1 results in poor resolution of inflammatory response.

## 776 **Table S1. Related to Figure 2.**

777 List of 199 KLA-induced genes that are elevated in *Phlpp1*<sup>-/-</sup> BMDMs compared to WT cells.

## 778 **Table S2. Related to Figure 2.**

779 List of 144 KLA-induced genes that are reduced in *Phlpp1*<sup>-/-</sup> BMDMs compared to WT cells.

780

781 **Figure S1 related to Figure 6.**

782 STAT1 phosphorylation and transcriptional activity are insensitive to okadaic acid. Western blot  
783 analysis of extracts used in the luciferase reporter assay in WT (+/+) and *Phlpp1*<sup>-/-</sup> (-/-) MEFs  
784 over-expressing GAS luciferase reporter and treated with 10 ng/ml IFN $\gamma$  for 0, 1, 6, or 24 h in  
785 combination with 1  $\mu$ M OA or DMSO control treatment for 15 minutes. Phosphorylation of the  
786 PP2A target site on Akt (Thr308) was increased upon OA treatment.

787 **Figure S2 related to Figure 6.**

788 The phosphatase activity of PHLPP1 is important for the regulation of STAT1 activity. (A) HeLa  
789 cells over-expressing the HA-tagged constructs used in Figure 6B were stained for HA (green),  
790  $\alpha$ -Tubulin (red), and DAPI (blue). Scale bar indicates 15  $\mu$ m. (B) The Nuclear to Cytoplasmic  
791 ratio was calculated for each construct and values are expressed as mean  $\pm$  SEM of: 169 cells for  
792 P1, 101 cells for PP2C, 100 cells for NLS-PP2C, and 101 cells for NLS-PP2C DDAA.

793

794 **Figure S3. Related to Figure 6.**

795 PHLPP1 has an NES. (A) Schematic showing position of NES (residues 1121-1134)  
796 immediately following the last LRR. (B) HeLa cells over-expressing PHLPP1, the NTE from  
797 WT PHLPP1 (NTE-WT) or the NTE-WT in which the PHLPP1 NES was fused to the N-  
798 terminus (<sup>PHLPP1</sup>NES-NTE) were stained for HA (green),  $\alpha$ -Tubulin (red), and DAPI (blue). Scale  
799 bar indicates 15  $\mu$ m.

800 **Figure S4. Related to Discussion.**

801 Luciferase reporter assay in HEK-293T cells over-expressing GAS luciferase reporter and  
802 treated with 10 ng/ml IFN $\gamma$  for 0, 1, 6, or 24 h followed by 250 nM Gö6983 for 10 min, 1  $\mu$ M  
803 staurosporine for 30 min, or DMSO control. Values are expressed as mean of RLU  $\pm$  SEM of  
804 three independent experiments.  
805

**A*****Escherichia coli* infection**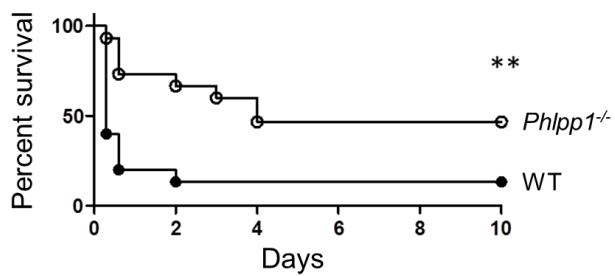**B****LPS injection**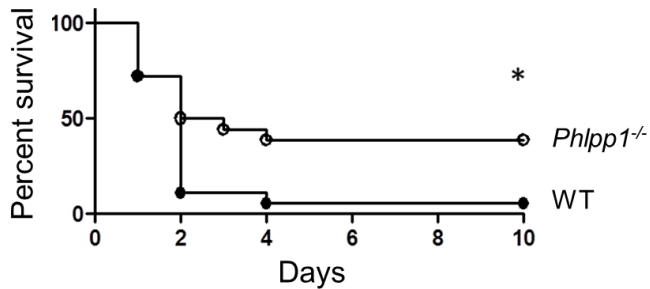**C**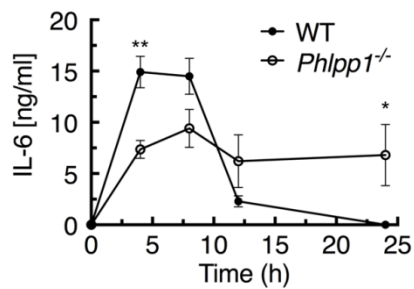**D**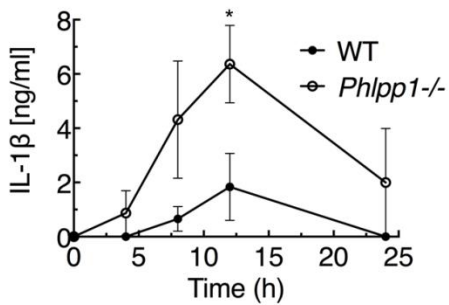**E**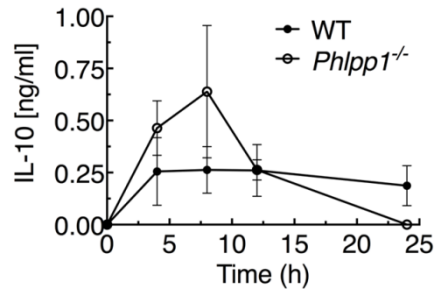**Figure 1**

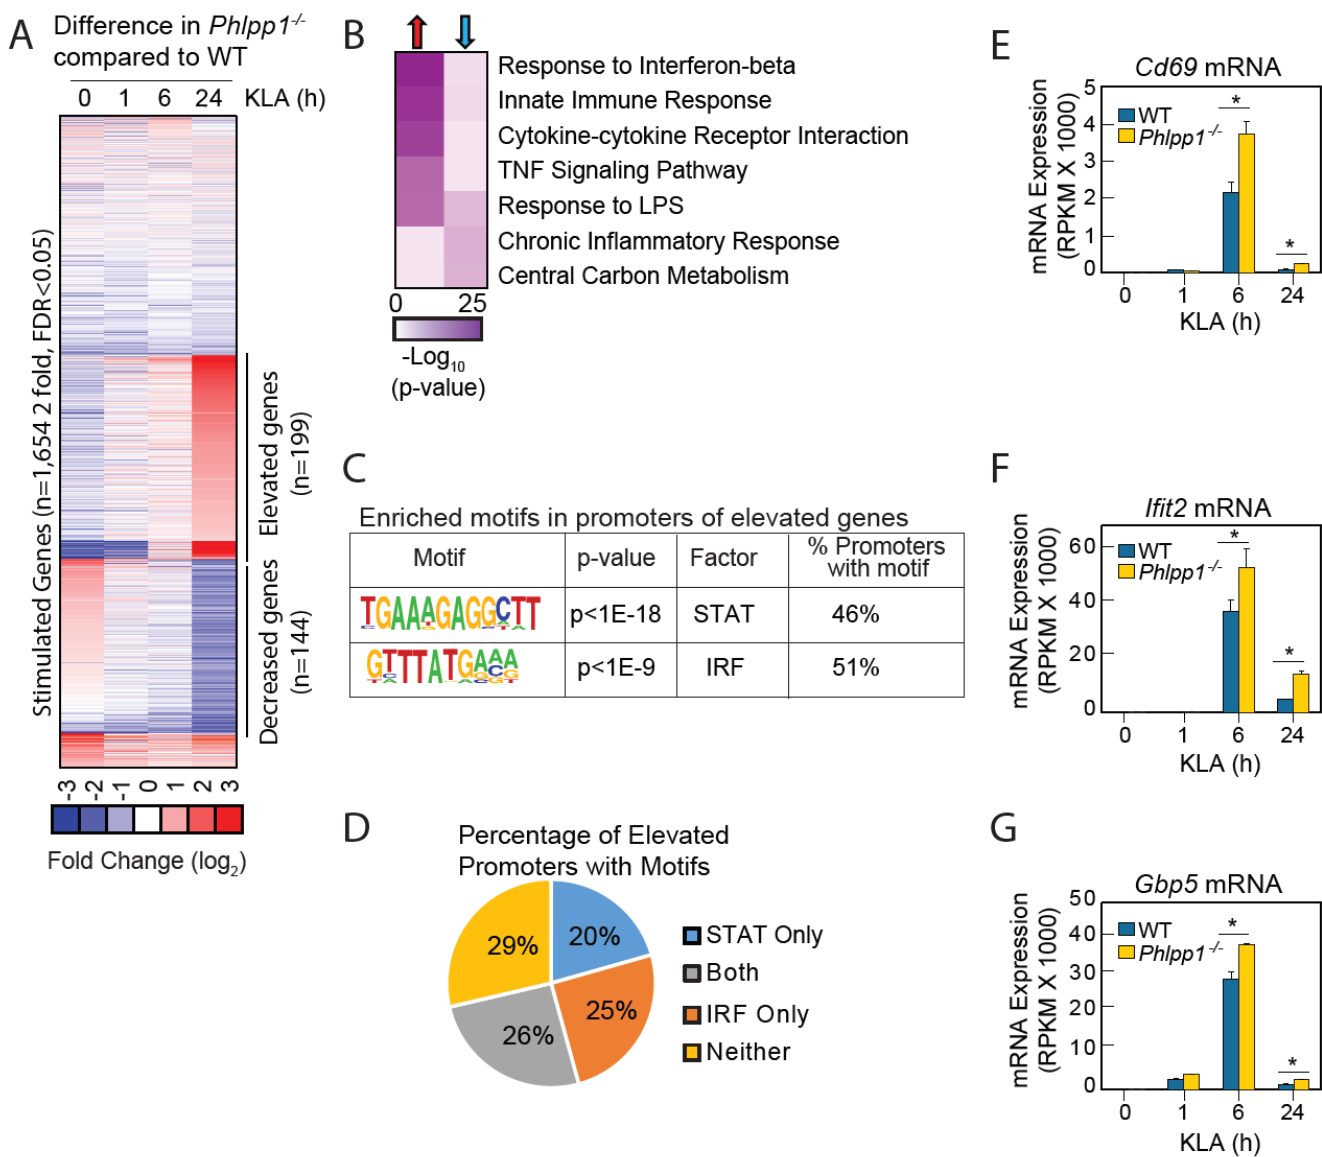

**Figure 2**

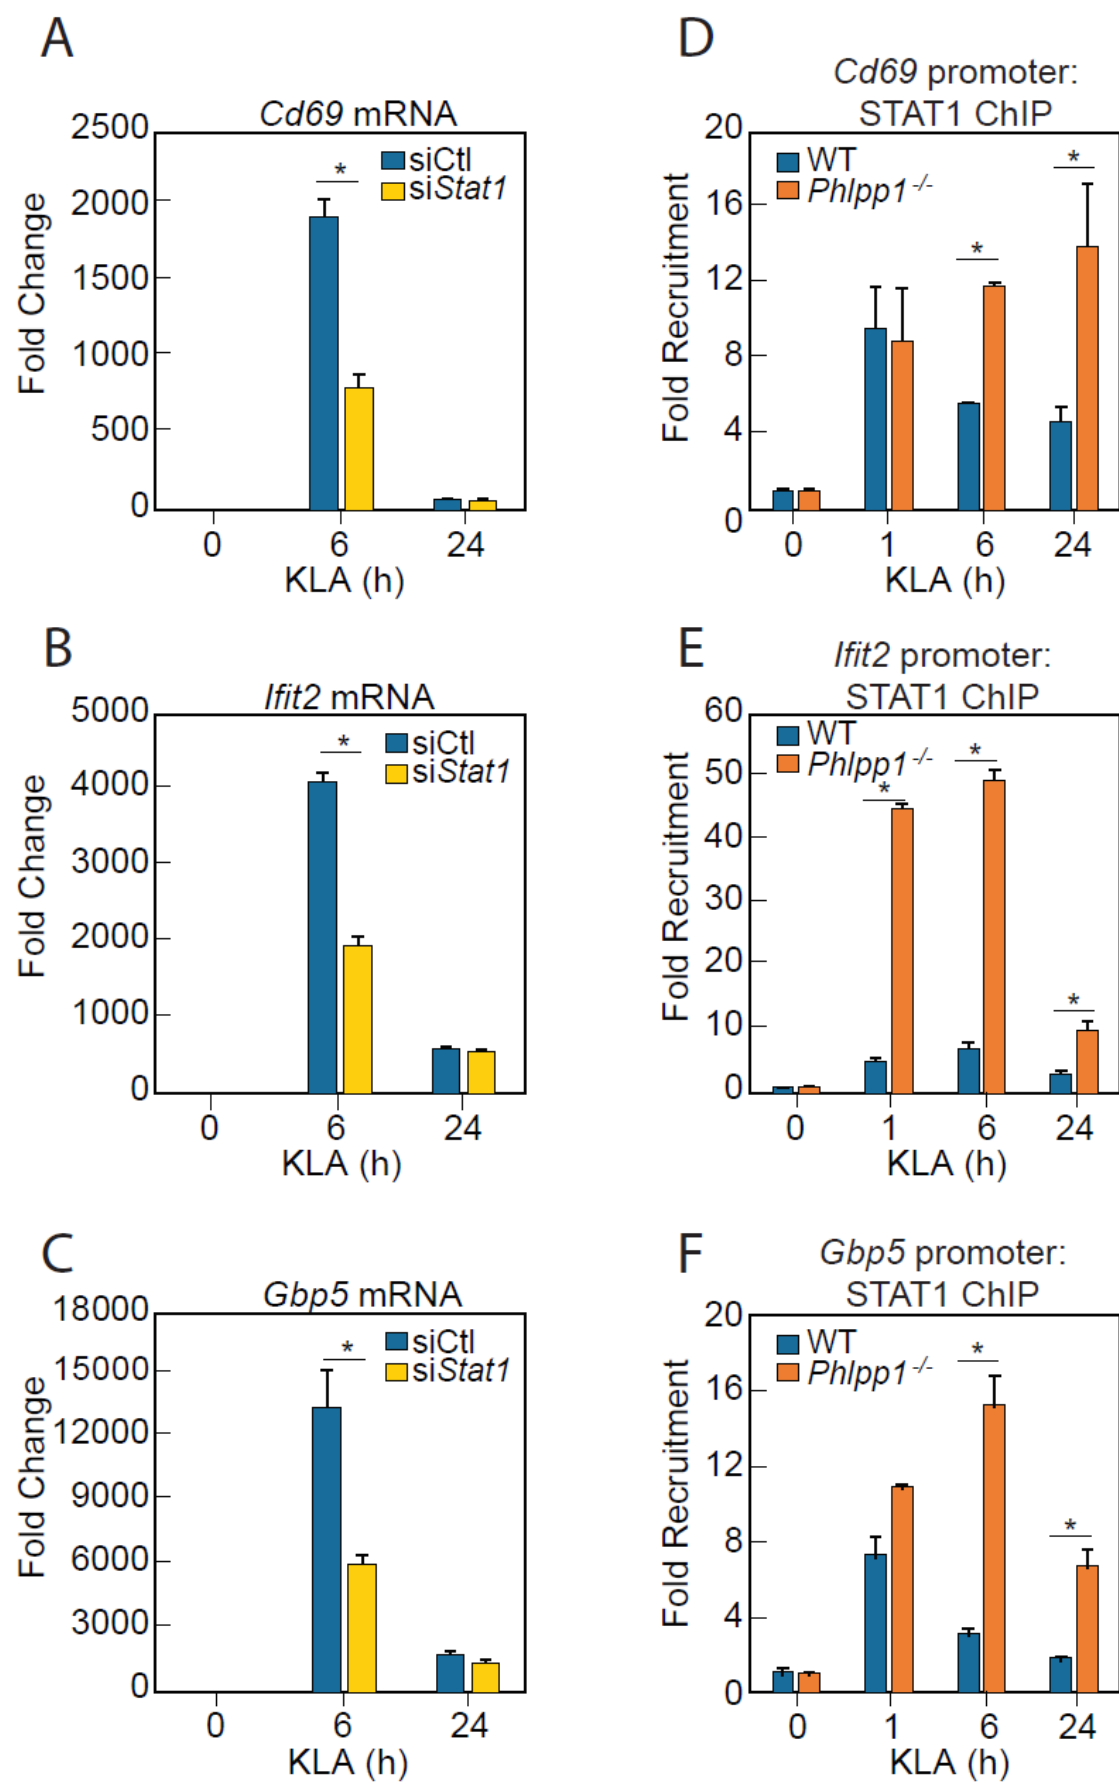

**Figure 3**

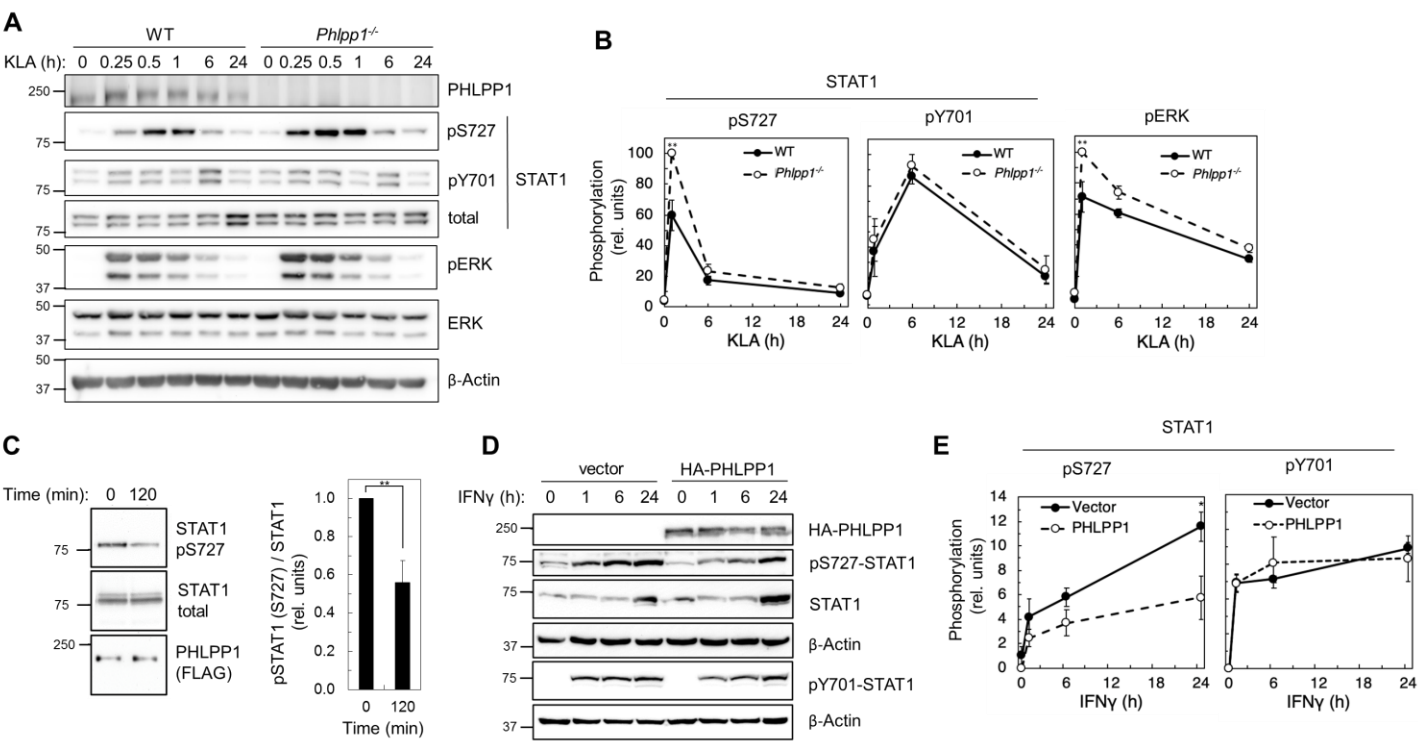

**Figure 4**



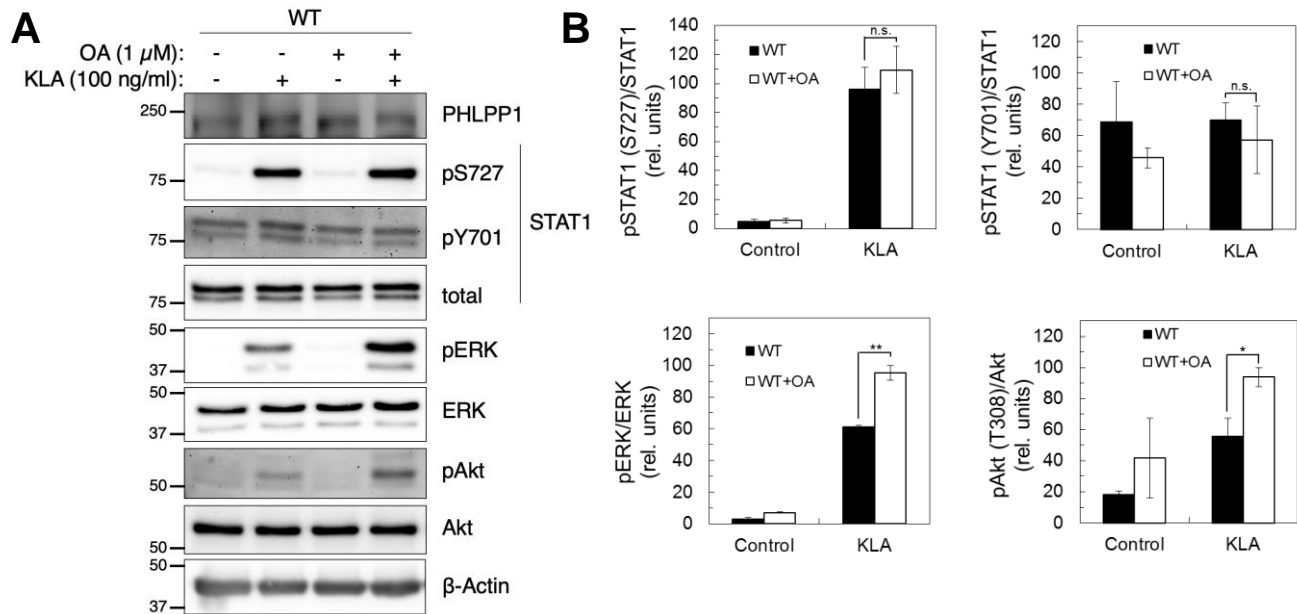

**Figure 5**

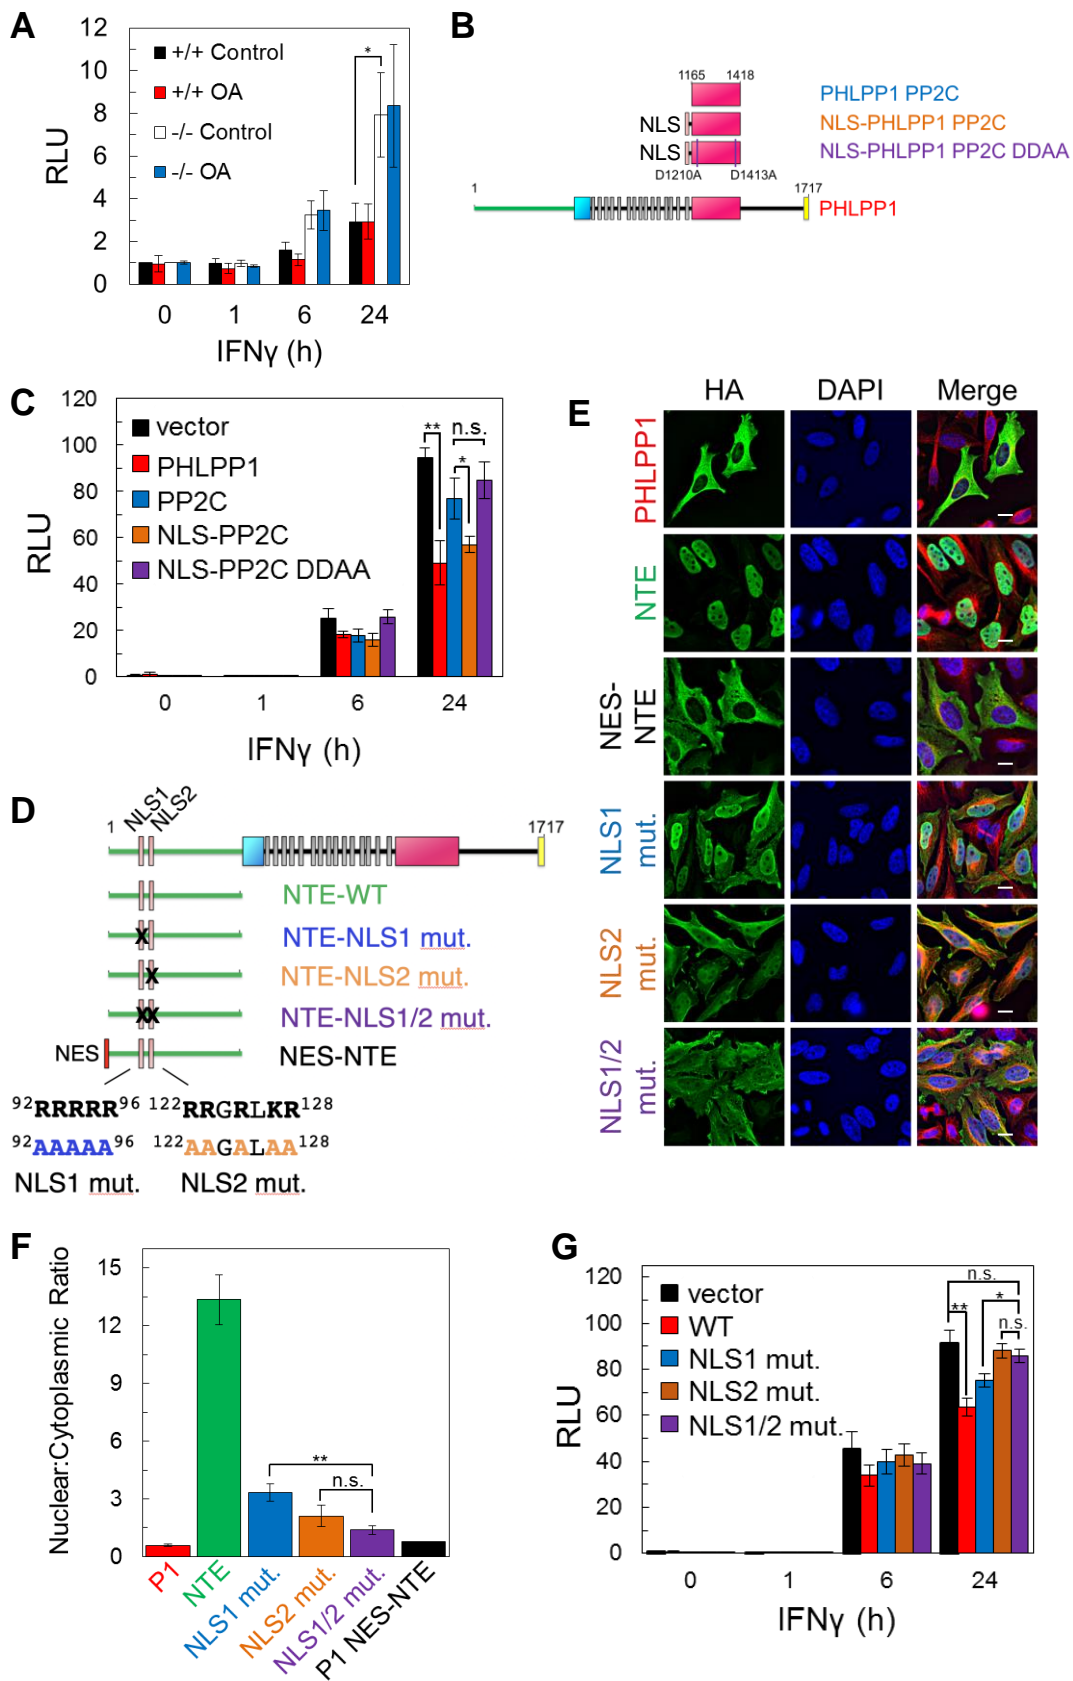

Figure 6

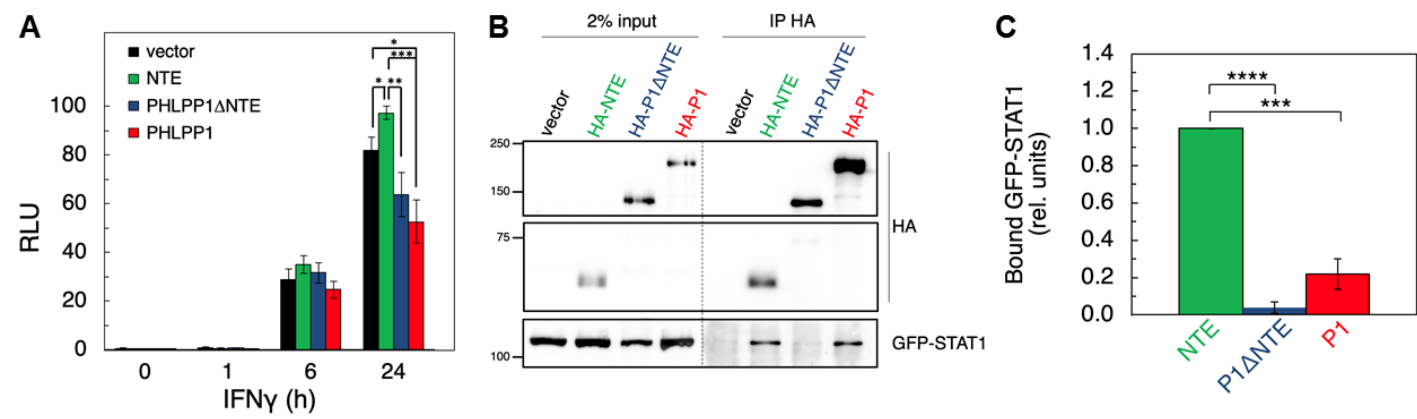

Figure 7

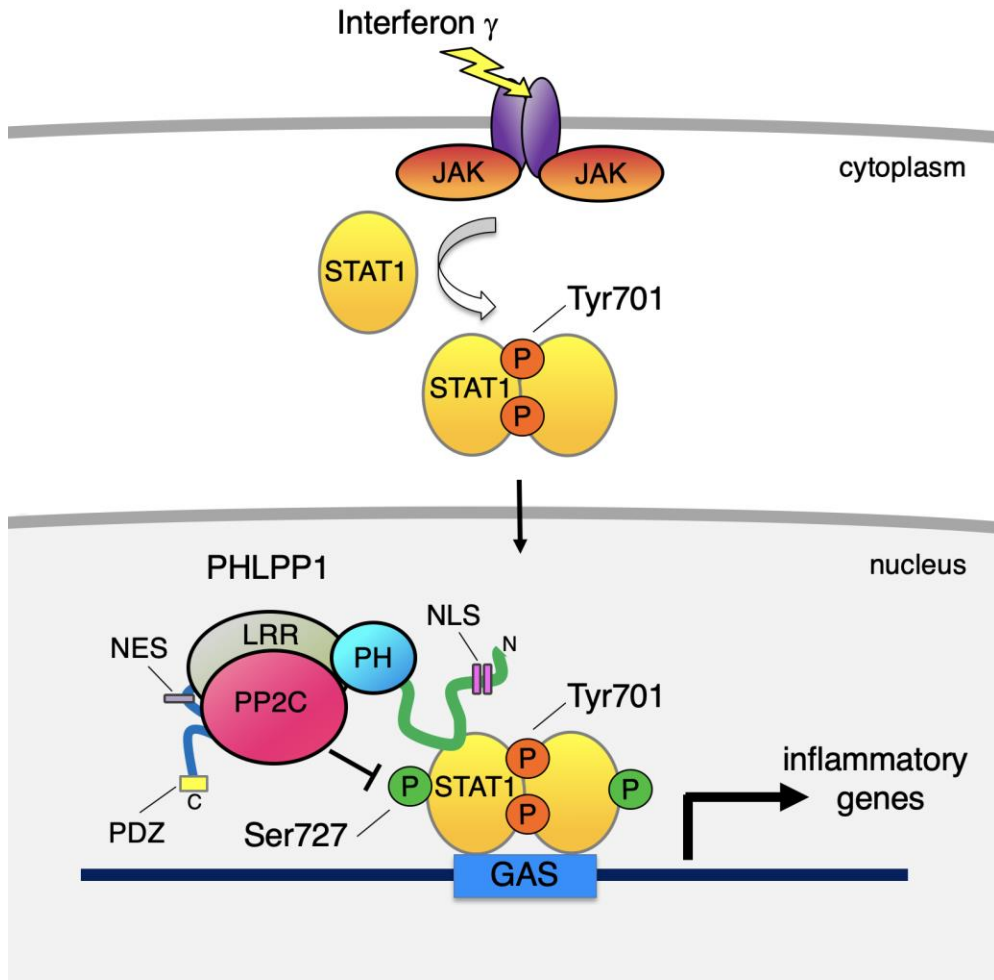

Figure 8

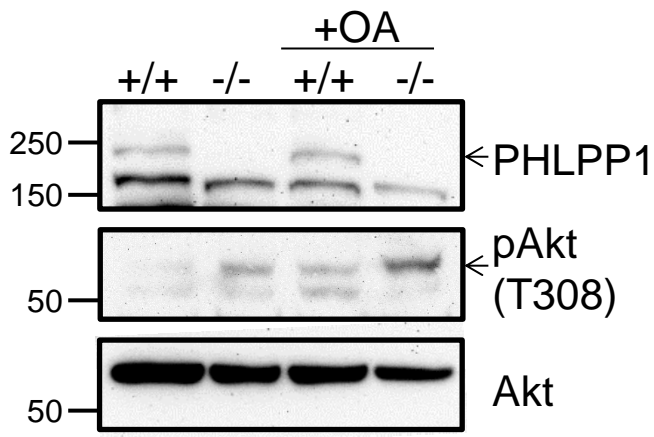

Figure S1

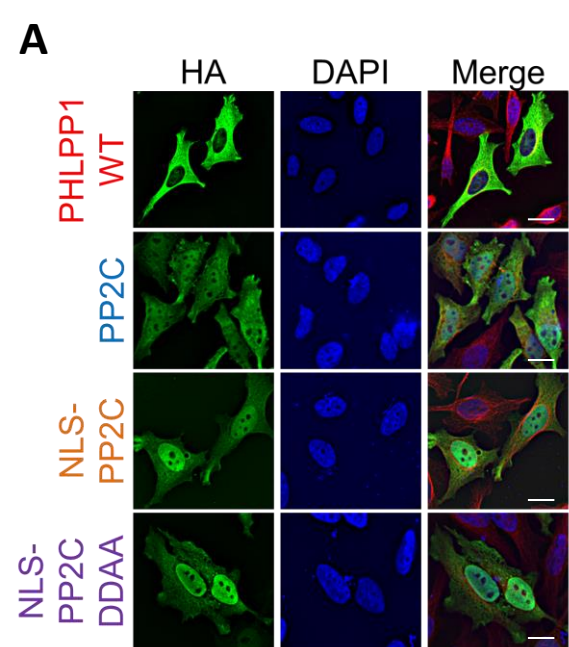

**B**

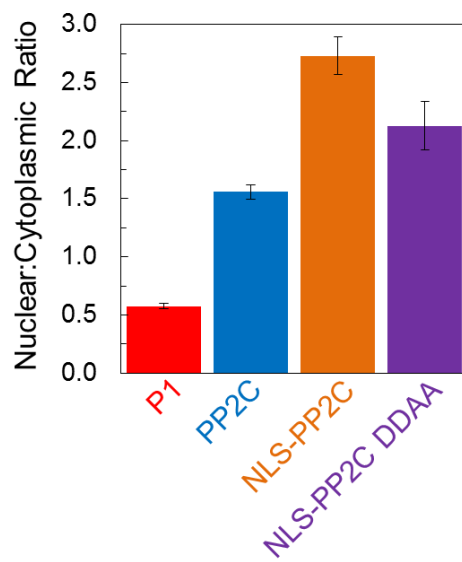

**Figure S2**

**A**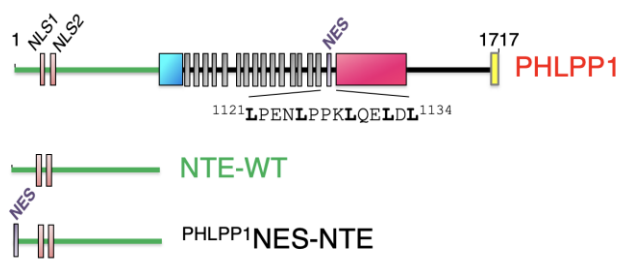**B**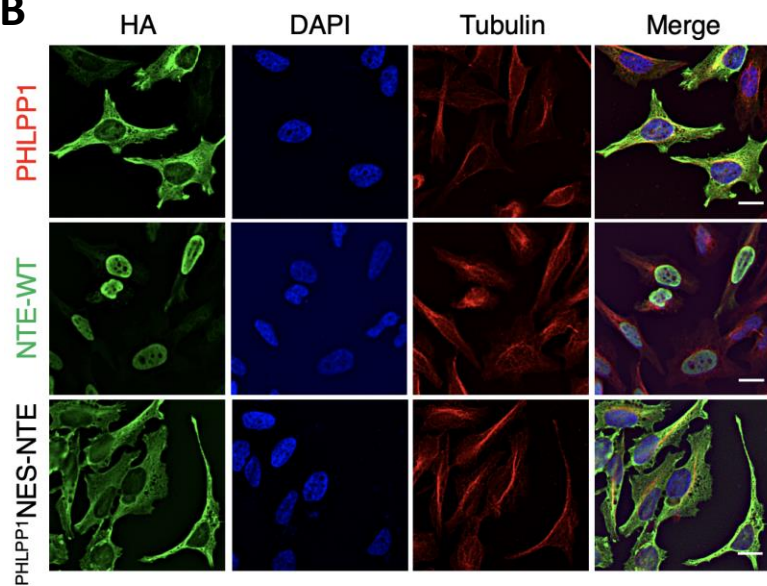**Figure S3**

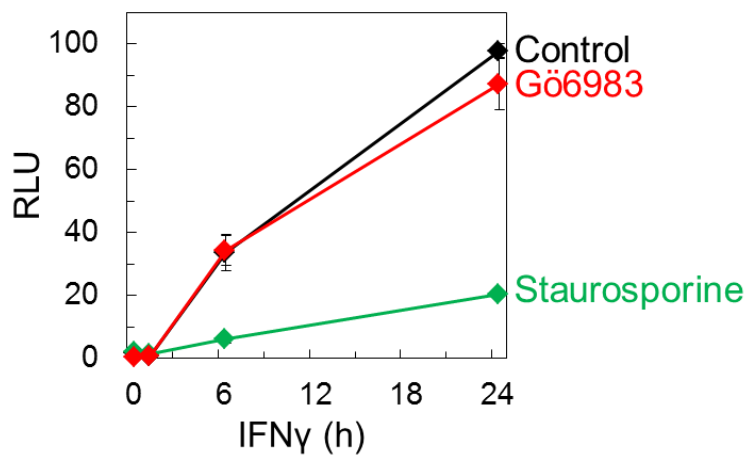

**Figure S4**
